# Supplementary material for: Measurements of spectral irradiance during the solar eclipse of 21 August 2017: reassessment of the effect of solar limb darkening and of changes in total ozone
Source: Copernicus journal article supplement (doi:10.5194/acp-19-4703-2019), 2019-04-09
Supplement: Supplementary file 3 [file acp-19-4703-2019-supplement.zip]

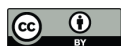

## *Supplement of*

# **Measurements of spectral irradiance during the solar eclipse of 21 August 2017: reassessment of the effect of solar limb darkening and of changes in total ozone**

**Germar Bernhard and Boyan Petkov**

*Correspondence to:* Germar Bernhard ([bernhard@biospherical.com](mailto:bernhard@biospherical.com))

- [acp-19-4703-2019-supplement-title-page.pdf](#)
- [Calibration\\_of\\_GUVis-3511.pdf](#)
- [Fig14\\_Global.csv](#)
- [Fig14\\_Shadowbanding.csv](#)
- [Fig3\\_SpectralResponse.csv](#)
- [Fig3\\_SpectralResponse.pdf](#)
- [Fig4\\_CosineError.pdf](#)
- [Fig8a\\_Measurement.csv](#)
- [Fig8a\\_Model.csv](#)
- [Fig8b\\_Connecting\\_lines.csv](#)
- [Fig8b\\_Measurement\\_to\\_Model.csv](#)
- [Fig8c\\_Measurement\\_model\\_corrected.csv](#)
- [Fig8c\\_Theory\\_Neckel.csv](#)
- [Fig8c\\_Theory\\_Pierce.csv](#)
- [Fig8c\\_Theory\\_Waldmeier.csv](#)
- [Fig8d\\_Meas\\_to\\_Neckel.csv](#)
- [Fig8d\\_Meas\\_to\\_Pierce.csv](#)
- [Fig8d\\_Meas\\_to\\_Waldmeier.csv](#)
- [Readme.pdf](#)

The copyright of individual parts of the supplement might differ from the CC BY 4.0 License.
