# Supplementary material for: Measurements of spectral irradiance during the solar eclipse of 21 August 2017: reassessment of the effect of solar limb darkening and of changes in total ozone
Source: Copernicus journal article supplement (doi:10.5194/acp-19-4703-2019), 2019-04-09
Supplement: Supplementary file 5 [file acp-19-4703-2019-supplement.zip]

## Contents of zip file

This zip file contains:

- **The pdf file Calibration\_of\_GUVis-3511.pdf, which includes:**
  - a detailed description of the method used to calibrate solar measurements performed with the GUVis-3511 radiometer during the solar eclipse of 21 August 2017,
  - an uncertainty budget of solar measurements of the GUVis-3511 radiometer, and
  - total ozone column calculated from 305 / 313 and 313 nm / 340 wavelength pairs.
- **PDF files with extended version of Figs. 3 and 4 of the paper, specifically:**
  - **Fig3\_SpectralResponse.pdf:** Normalized spectral response functions of the GUVis-3511 radiometer, plotted separately for UV, visible, and IR wavelengths.
  - **Fig4\_CosineError.pdf:** Cosine error of the GUVis-3511 radiometer, plotted separately for UV (Panel a) and visible and IR (Panel b) wavelengths. Measurements of the cosine error at wavelengths below 395 nm are affected by noise due the low UV output of the incandescent lamp used for the characterization.
- **14 comma-separated text files with calibrated solar data and other data shown in Figs. 3, 8, and 14 of the paper, specifically:**
  - **Fig3\_SpectralResponse.csv:** Normalized spectral response functions of the GUVis-3511 radiometer shown in Fig. 3.
  - **Fig8a\_Measurement.csv:** Measurements of global spectral irradiance shown in Fig. 8a. Units are  $\mu\text{W cm}^{-2} \text{ nm}^{-1}$ .
  - **Fig8a\_Model.csv:** Radiative transfer model calculations shown in Fig. 8a. Units are  $\mu\text{W cm}^{-2} \text{ nm}^{-1}$ .
  - **Fig8b\_Measurement\_to\_Model.csv:** Ratio of measured and modeled global spectral irradiance shown in Fig. 8b.
  - **Fig8b\_Connecting\_lines.csv:** Lines connecting ratios of measurement and model at the times of the 1<sup>st</sup> and 4<sup>th</sup> contact shown in Fig. 8b.
  - **Fig8c\_Measurement\_model\_corrected.csv:** Ratio of measurement and model, corrected for the bias between measurement and model shown in Fig. 8c.
  - **Fig8c\_Theory\_Pierce.csv:** Theoretical solar limb darkening effect calculated with the parameterizations by Pierce shown in Fig. 8c.
  - **Fig8c\_Theory\_Neckel.csv:** Theoretical solar limb darkening effect calculated with the parameterizations by Neckel.

- **Fig8c\_Theory\_Waldmeier.csv:** Theoretical limb darkening effect calculated with the parameterizations by Waldmeier.
- **Fig8d\_Meas\_to\_Pierce.csv:** Ratio of the measured and theoretical solar limb darkening effect using the parameterization by Pierce shown in Fig. 8d.
- **Fig8d\_Meas\_to\_Neckel.csv:** Ratio of the measured and theoretical solar limb darkening effect using the parameterization by Neckel.
- **Fig8d\_Meas\_to\_Waldmeier.csv:** Ratio of the measured and theoretical solar limb darkening effect using the parameterization by Waldmeier.
- **Fig14\_Global.csv:** Measurements of global spectral irradiance shown in Fig. 14.  
Units are  $\mu\text{W cm}^{-2} \text{ nm}^{-1}$ .
- **Fig14\_Shadowbanding.csv:** Measurements of spectral irradiance during shadowbanding shown in Fig. 14. Units are  $\mu\text{W cm}^{-2} \text{ nm}^{-1}$ .
