# Supplementary material for: Measurements of spectral irradiance during the solar eclipse of 21 August 2017: reassessment of the effect of solar limb darkening and of changes in total ozone
Source: Copernicus journal article supplement (doi:10.5194/acp-19-4703-2019), 2019-04-09
Supplement: Supplementary file 6 [file acp-19-4703-2019-supplement.zip]

Archive with 19 entries (19 files):
- Fig8b_Connecting_lines.csv
- Fig8d_Meas_to_Waldmeier.csv
- Fig8d_Meas_to_Pierce.csv
- Fig3_SpectralResponse.csv
- Fig8a_Measurement.csv
- Fig14_Shadowbanding.csv
- Fig8a_Model.csv
- Fig8c_Theory_Waldmeier.csv
- Fig4_CosineError.pdf
- Fig14_Global.csv
- Readme.pdf
- Fig8b_Measurement_to_Model.csv
- Fig8c_Theory_Neckel.csv
- Fig8c_Measurement_model_corrected.csv
- Fig3_SpectralResponse.pdf
- Calibration_of_GUVis-3511.pdf
- Fig8d_Meas_to_Neckel.csv
- acp-19-4703-2019-supplement-title-page.pdf
- Fig8c_Theory_Pierce.csv
