# Supplementary material for: Measurements of spectral irradiance during the solar eclipse of 21 August 2017: reassessment of the effect of solar limb darkening and of changes in total ozone
Source: Copernicus journal article supplement (doi:10.5194/acp-19-4703-2019), 2019-04-09
Supplement: Supplementary file 6 [file acp-19-4703-2019-supplement.zip › Fig3_SpectralResponse.csv]

Wavelength	Es305	Es306	Es313	Es320	Es340	Es341	Es380	Es395	Es412	Es443	Es490	Es532	Es555	Es556	Es665	Es875	Es940	Es1020
269	0	0	0	0	0	0	0	0	0	0	0	0	0	0	0	0	0	0
269.5	0	0	0	0	0	0	0	0	0	0	0	0	0	0	0	0	0	0
270	0	0	0	0	0	0	0	0	0	0	0	0	0	0	0	0	0	0
270.5	0	0	0	0	0	0	0	0	0	0	0	0	0	0	0	0	0	0
271	0.0264576	0	0	0	0	0	0	0	0	0	0	0	0	0	0	0	0	0
271.5	0.0315368	0	0	0	0	0	0	0	0	0	0	0	0	0	0	0	0	0
272	0.0322938	0	0	0	0	0	0	0	0	0	0	0	0	0	0	0	0	0
272.5	0.037499	0	0	0	0	0	0	0	0	0	0	0	0	0	0	0	0	0
273	0.0478546	0	0	0	0	0	0	0	0	0	0	0	0	0	0	0	0	0
273.5	0.061112	0.0255344	0	0	0	0	0	0	0	0	0	0	0	0	0	0	0	0
274	0.0706176	0.06673	0	0	0	0	0	0	0	0	0	0	0	0	0	0	0	0
274.5	0.0747	0.0487762	0	0	0	0	0	0	0	0	0	0	0	0	0	0	0	0
275	0.075842	0.0449784	0	0	0	0	0	0	0	0	0	0	0	0	0	0	0	0
275.5	0.0781628	0.0660742	0	0	0	0	0	0	0	0	0	0	0	0	0	0	0	0
276	0.0858458	0.0912754	0	0	0	0	0	0	0	0	0	0	0	0	0	0	0	0
276.5	0.0949788	0.1103268	0	0	0	0	0	0	0	0	0	0	0	0	0	0	0	0
277	0.0981584	0.123281	0	0	0	0	0	0	0	0	0	0	0	0	0	0	0	0
277.5	0.102786	0.1227758	0	0	0	0	0	0	0	0	0	0	0	0	0	0	0	0
278	0.1225198	0.1050814	0	0	0	0	0	0	0	0	0	0	0	0	0	0	0	0
278.5	0.148761	0.0925914	0	0	0	0	0	0	0	0	0	0	0	0	0	0	0	0
279	0.156283	0.105782	0	0	0	0	0	0	0	0	0	0	0	0	0	0	0	0
279.5	0.1541174	0.1335358	0	0	0	0	0	0	0	0	0	0	0	0	0	0	0	0
280	0.1639902	0.1423554	0	0	0	0	0	0	0	0	0	0	0	0	0	0	0	0
280.5	0.1832942	0.1422248	0	0	0	0	0	0	0	0	0	0	0	0	0	0	0	0
281	0.1987314	0.1610542	0	0	0	0	0	0	0	0	0	0	0	0	0	0	0	0
281.5	0.2102746	0.1913908	0	0	0	0	0	0	0	0	0	0	0	0	0	0	0	0
282	0.2238832	0.2043314	0	0	0	0	0	0	0	0	0	0	0	0	0	0	0	0
282.5	0.2386976	0.2018608	0	0	0	0	0	0	0	0	0	0	0	0	0	0	0	0
283	0.2511886	0.2000908	0	0	0	0	0	0	0	0	0	0	0	0	0	0	0	0
283.5	0.2641128	0.206837	0	0	0	0	0	0	0	0	0	0	0	0	0	0	0	0
284	0.282534	0.2268972	0	0	0	0	0	0	0	0	0	0	0	0	0	0	0	0
284.5	0.3042888	0.2554494	0	0	0	0	0	0	0	0	0	0	0	0	0	0	0	0
285	0.3239714	0.2818964	0	0	0	0	0	0	0	0	0	0	0	0	0	0	0	0
285.5	0.3403398	0.302874	0	0	0	0	0	0	0	0	0	0	0	0	0	0	0	0
286	0.354364	0.3189976	0	0	0	0	0	0	0	0	0	0	0	0	0	0	0	0
286.5	0.3701114	0.3337666	0	0	0	0	0	0	0	0	0	0	0	0	0	0	0	0
287	0.3922656	0.3516694	0	0	0	0	0	0	0	0	0	0	0	0	0	0	0	0
287.5	0.4165892	0.3736176	0	0	0	0	0	0	0	0	0	0	0	0	0	0	0	0
288	0.4357218	0.3988498	0	0	0	0	0	0	0	0	0	0	0	0	0	0	0	0
288.5	0.4532	0.423752	0	0	0	0	0	0	0	0	0	0	0	0	0	0	0	0
289	0.4760096	0.4436602	0	0	0	0	0	0	0	0	0	0	0	0	0	0	0	0
289.5	0.4994708	0.459116	0	0	0	0	0	0	0	0	0	0	0	0	0	0	0	0
290	0.5153752	0.4727536	0	0	0	0	0	0	0	0	0	0	0	0	0	0	0	0
290.5	0.5297798	0.4859854	0	0	0	0	0	0	0	0	0	0	0	0	0	0	0	0
291	0.552682	0.4999392	0	0	0	0	0	0	0	0	0	0	0	0	0	0	0	0
291.5	0.5781662	0.5170464	0	0	0	0	0	0	0	0	0	0	0	0	0	0	0	0
292	0.5950262	0.5394488	0	0	0	0	0	0	0	0	0	0	0	0	0	0	0	0
292.5	0.604521	0.560773	0	0	0	0	0	0	0	0	0	0	0	0	0	0	0	0
293	0.6126714	0.5728822	0	0	0	0	0	0	0	0	0	0	0	0	0	0	0	0
293.5	0.625035	0.583379	0	0	0	0	0	0	0	0	0	0	0	0	0	0	0	0
294	0.6458982	0.6040748	0	0	0	0	0	0	0	0	0	0	0	0	0	0	0	0
294.5	0.6691358	0.6330994	0	0	0	0	0	0	0	0	0	0	0	0	0	0	0	0
295	0.6863074	0.6636606	0	0	0	0	0	0	0	0	0	0	0	0	0	0	0	0
295.5	0.7044808	0.6921426	0	0	0	0	0	0	0	0	0	0	0	0	0	0	0	0
296	0.7342022	0.7158348	0	0	0	0	0	0	0	0	0	0	0	0	0	0	0	0
296.5	0.7653568	0.7309912	0	0	0	0	0	0	0	0	0	0	0	0	0	0	0	0
297	0.7821542	0.7353002	0	0	0	0	0	0	0	0	0	0	0	0	0	0	0	0
297.5	0.7919768	0.7391554	0	0	0	0	0	0	0	0	0	0	0	0	0	0	0	0
298	0.8081928	0.75506	0	0	0	0	0	0	0	0	0	0	0	0	0	0	0	0
298.5	0.8257038	0.780085	0	0	0	0	0	0	0	0	0	0	0	0	0	0	0	0
299	0.8347736	0.8064658	0	0	0	0	0	0	0	0	0	0	0	0	0	0	0	0
299.5	0.839772	0.8308496	0	0	0	0	0	0	0	0	0	0	0	0	0	0	0	0
300	0.8486864	0.8519034	0	0	0	0	0	0	0	0	0	0	0	0	0	0	0	0
300.5	0.8628588	0.8718056	0	0	0	0	0	0	0	0	0	0	0	0	0	0	0	0
301	0.8820138	0.893336	0	0	0	0	0	0	0	0	0	0	0	0	0	0	0	0
301.5	0.9089308	0.9162122	0	0	0	0	0	0	0	0	0	0	0	0	0	0	0	0
302	0.9379506	0.9383202	0	0	0	0	0	0	0	0	0	0	0	0	0	0	0	0
302.5	0.9522702	0.9595264	0	0	0	0	0	0	0	0	0	0	0	0	0	0	0	0
303	0.9620164	0.968131	0	0	0	0	0	0	0	0	0	0	0	0	0	0	0	0
303.5	0.9582276	0.9553908	0	0	0	0	0	0	0	0	0	0	0	0	0	0	0	0
304	0.9744352	0.9800934	0	0	0	0	0	0	0	0	0	0	0	0	0	0	0	0
304.5	0.9753382	0.9836228	0	0	0	0	0	0	0	0	0	0	0	0	0	0	0	0
305	0.9756844	0.9731082	0	0	0	0	0	0	0	0	0	0	0	0	0	0	0	0
305.5	0.9894492	0.9915406	0	0	0	0	0	0	0	0	0	0	0	0	0	0	0	0
306	0.997814	0.9931966	0.0052024	0	0	0	0	0	0	0	0	0	0	0	0	0	0	0
306.5	0.9841792	0.987528	0.0169526	0	0	0	0	0	0	0	0	0	0	0	0	0	0	0
307	0.9101612	0.9216442	0.0236042	0	0	0	0	0	0	0	0	0	0	0	0	0	0	0
307.5	0.7799134	0.79608	0.066546	0	0	0	0	0	0	0	0	0	0	0	0	0	0	0
308	0.5934338	0.5979528	0.131613	0	0	0	0	0	0	0	0	0	0	0	0	0	0	0
308.5	0.408984	0.4256772	0.237827	0	0	0	0	0	0	0	0	0	0	0	0	0	0	0
309	0.2426364	0.2567532	0.384233	0	0	0	0	0	0	0	0	0	0	0	0	0	0	0
309.5	0.1225968	0.1253658	0.5521898	0	0	0	0	0	0	0	0	0	0	0	0	0	0	0
310	0.0692112	0.0633448	0.6315478	0	0	0	0	0	0	0	0	0	0	0	0	0	0	0
310.5	0.0366292	0.0292092	0.6799264	0.0013056	0	0	0	0	0	0	0	0	0	0	0	0	0	0
311	0.0176066	0.0158064	0.70728	0.0072496	0	0	0	0	0	0	0	0	0	0	0	0	0	0
311.5	0.0106558	0.00818	0.740051	0.010718	0	0	0	0	0	0	0	0	0	0	0	0	0	0
312	0.0019442	0.001345	0.7703236	0.0170372	0	0	0	0	0	0	0	0	0	0	0	0	0	0
312.5	0	0	0.7976356	0.0437872	0	0	0	0	0	0	0	0	0	0	0	0	0	0
313	0	0	0.8312354	0.08164	0	0	0	0	0	0	0	0	0	0	0	0	0	0
313.5	0	0	0.866427	0.1637852	0	0	0	0	0	0	0	0	0	0	0	0	0	0
314	0	0	0.8939354	0.2822518	0	0	0	0	0	0	0	0	0	0	0	0	0	0
314.5	0	0	0.937254	0.471231	0	0	0	0	0	0	0	0	0	0	0	0	0	0
315	0	0	0.9378352	0.6341576	0	0	0	0	0	0	0	0	0	0	0	0	0	0
315.5	0	0	0.930613	0.7415102	0	0	0	0	0	0	0	0	0	0	0	0	0	0
316	0	0	0.9662536	0.7950488	0	0	0	0	0	0	0	0	0	0	0	0	0	0
316.5	0	0	0.9829006	0.8101922	0	0	0	0	0	0	0	0	0	0	0	0	0	0
317	0	0	0.9945586	0.826353	0	0	0	0	0	0	0	0	0	0	0	0	0	0
317.5	0	0	0.969633	0.8439062	0	0	0	0	0	0	0	0	0	0	0	0	0	0
318	0	0	0.860565	0.8747606	0	0	0	0	0	0	0	0	0	0	0	0	0	0
318.5	0	0	0.6347274	0.9091112	0	0	0	0	0	0	0	0	0	0	0	0	0	0
319	0	0	0.4186682	0.9267336	0	0	0	0	0	0	0	0	0	0	0	0	0	0
319.5	0	0	0.2498598	0.9485696	0	0	0	0	0	0	0	0	0	0	0	0	0	0
320	0	0	0.1399704	0.9653066	0	0	0	0	0	0	0	0	0	0	0	0	0	0
320.5	0	0	0.0789102	0.9707468	0	0	0	0	0	0	0	0	0	0	0	0	0	0
321	0	0	0.0448576	0.9703464	0	0	0	0	0	0	0	0	0	0	0	0	0	0
321.5	0	0	0.023381	0.9869802	0	0	0	0	0	0	0	0	0	0	0	0	0	0
322	0	0	0.0132534	0.9976492	0	0	0	0	0	0	0	0	0	0	0	0	0	0
322.5	0	0	0.0105052	0.9798194	0	0	0	0	0	0	0	0	0	0	0	0	0	0
323	0	0	0.005832	0.9151222	0	0	0	0	0	0	0	0	0	0	0	0	0	0
323.5	0	0	0.0031868	0.7487998	0	0	0	0	0	0	0	0	0	0	0	0	0	0
324	0	0	0.0005598	0.5321902	0	0	0	0	0	0	0	0	0	0	0	0	0	0
324.5	0	0	0	0.3199956	0	0	0	0	0	0	0	0	0	0	0	0	0	0
325	0	0	0	0.1554312	0	0	0	0	0	0	0	0	0	0	0	0	0	0
325.5	0	0	0	0.0797526	0	0	0	0	0	0	0	0	0	0	0	0	0	0
326	0	0	0	0.0429858	0	0	0	0	0	0	0	0	0	0	0	0	0	0
326.5	0	0	0	0.0235358	0	0	0	0	0	0	0	0	0	0	0	0	0	0
327	0	0	0	0.014584	0	0	0	0	0	0	0	0	0	0	0	0	0	0
327.5	0	0	0	0.0086886	0	0	0	0	0	0	0	0	0	0	0	0	0	0
328	0	0	0	0.0055628	0	0	0	0	0	0	0	0	0	0	0	0	0	0
328.5	0	0	0	0.0034194	0	0	0	0	0	0	0	0	0	0	0	0	0	0
329	0	0	0	0.0006018	0	0	0	0	0	0	0	0	0	0	0	0	0	0
329.5	0	0	0	0	0	0	0	0	0	0	0	0	0	0	0	0	0	0
330	0	0	0	0	0	0	0	0	0	0	0	0	0	0	0	0	0	0
330.5	0	0	0	0	0	0	0	0	0	0	0	0	0	0	0	0	0	0
331	0	0	0	0	0	0	0	0	0	0	0	0	0	0	0	0	0	0
331.5	0	0	0	0	0	0	0	0	0	0	0	0	0	0	0	0	0	0
332	0	0	0	0	0	0	0	0	0	0	0	0	0	0	0	0	0	0
332.5	0	0	0	0	0.001032	0.0007512	0	0	0	0	0	0	0	0	0	0	0	0
333	0	0	0	0	0.0075556	0.0025158	0	0	0	0	0	0	0	0	0	0	0	0
333.5	0	0	0	0	0.0174412	0.0134876	0	0	0	0	0	0	0	0	0	0	0	0
334	0	0	0	0	0.0476346	0.0320368	0	0	0	0	0	0	0	0	0	0	0	0
334.5	0	0	0	0	0.1214134	0.1042074	0	0	0	0	0	0	0	0	0	0	0	0
335	0	0	0	0	0.2749394	0.2407232	0	0	0	0	0	0	0	0	0	0	0	0
335.5	0	0	0	0	0.5048818	0.475486	0	0	0	0	0	0	0	0	0	0	0	0
336	0	0	0	0	0.7285246	0.6940964	0	0	0	0	0	0	0	0	0	0	0	0
336.5	0	0	0	0	0.8561324	0.8086382	0	0	0	0	0	0	0	0	0	0	0	0
337	0	0	0	0	0.8941694	0.837048	0	0	0	0	0	0	0	0	0	0	0	0
337.5	0	0	0	0	0.9374674	0.8894606	0	0	0	0	0	0	0	0	0	0	0	0
338	0	0	0	0	0.9803012	0.9517144	0	0	0	0	0	0	0	0	0	0	0	0
338.5	0	0	0	0	0.9899676	0.9805532	0	0	0	0	0	0	0	0	0	0	0	0
339	0	0	0	0	0.9845802	0.983867	0	0	0	0	0	0	0	0	0	0	0	0
339.5	0	0	0	0	0.9932812	0.9883358	0	0	0	0	0	0	0	0	0	0	0	0
340	0	0	0	0	0.9871006	0.9789572	0	0	0	0	0	0	0	0	0	0	0	0
340.5	0	0	0	0	0.9686028	0.9546842	0	0	0	0	0	0	0	0	0	0	0	0
341	0	0	0	0	0.9733542	0.967723	0	0	0	0	0	0	0	0	0	0	0	0
341.5	0	0	0	0	0.9577444	0.9808262	0	0	0	0	0	0	0	0	0	0	0	0
342	0	0	0	0	0.924122	0.9937578	0	0	0	0	0	0	0	0	0	0	0	0
342.5	0	0	0	0	0.862242	0.9908712	0	0	0	0	0	0	0	0	0	0	0	0
343	0	0	0	0	0.7820838	0.9562452	0	0	0	0	0	0	0	0	0	0	0	0
343.5	0	0	0	0	0.6901848	0.8728612	0	0	0	0	0	0	0	0	0	0	0	0
344	0	0	0	0	0.564071	0.7220088	0	0	0	0	0	0	0	0	0	0	0	0
344.5	0	0	0	0	0.3956534	0.5001104	0	0	0	0	0	0	0	0	0	0	0	0
345	0	0	0	0	0.2232758	0.269995	0	0	0	0	0	0	0	0	0	0	0	0
345.5	0	0	0	0	0.1002758	0.1183718	0	0	0	0	0	0	0	0	0	0	0	0
346	0	0	0	0	0.0379398	0.0424802	0	0	0	0	0	0	0	0	0	0	0	0
346.5	0	0	0	0	0.0122622	0.01687	0	0	0	0	0	0	0	0	0	0	0	0
347	0	0	0	0	0.0041288	0.0109792	0	0	0	0	0	0	0	0	0	0	0	0
347.5	0	0	0	0	0.0006146	0.002067	0	0	0	0	0	0	0	0	0	0	0	0
348	0	0	0	0	0	0	0	0	0	0	0	0	0	0	0	0	0	0
348.5	0	0	0	0	0	0	0	0	0	0	0	0	0	0	0	0	0	0
349	0	0	0	0	0	0	0	0	0	0	0	0	0	0	0	0	0	0
349.5	0	0	0	0	0	0	0	0	0	0	0	0	0	0	0	0	0	0
350	0	0	0	0	0	0	0	0	0	0	0	0	0	0	0	0	0	0
350.5	0	0	0	0	0	0	0	0	0	0	0	0	0	0	0	0	0	0
351	0	0	0	0	0	0	0	0	0	0	0	0	0	0	0	0	0	0
351.5	0	0	0	0	0	0	0	0	0	0	0	0	0	0	0	0	0	0
352	0	0	0	0	0	0	0	0	0	0	0	0	0	0	0	0	0	0
352.5	0	0	0	0	0	0	0	0	0	0	0	0	0	0	0	0	0	0
353	0	0	0	0	0	0	0	0	0	0	0	0	0	0	0	0	0	0
353.5	0	0	0	0	0	0	0	0	0	0	0	0	0	0	0	0	0	0
354	0	0	0	0	0	0	0	0	0	0	0	0	0	0	0	0	0	0
354.5	0	0	0	0	0	0	0	0	0	0	0	0	0	0	0	0	0	0
355	0	0	0	0	0	0	0	0	0	0	0	0	0	0	0	0	0	0
355.5	0	0	0	0	0	0	0	0	0	0	0	0	0	0	0	0	0	0
356	0	0	0	0	0	0	0	0	0	0	0	0	0	0	0	0	0	0
356.5	0	0	0	0	0	0	0	0	0	0	0	0	0	0	0	0	0	0
357	0	0	0	0	0	0	0	0	0	0	0	0	0	0	0	0	0	0
357.5	0	0	0	0	0	0	0	0	0	0	0	0	0	0	0	0	0	0
358	0	0	0	0	0	0	0	0	0	0	0	0	0	0	0	0	0	0
358.5	0	0	0	0	0	0	0	0	0	0	0	0	0	0	0	0	0	0
359	0	0	0	0	0	0	0	0	0	0	0	0	0	0	0	0	0	0
359.5	0	0	0	0	0	0	0	0	0	0	0	0	0	0	0	0	0	0
360	0	0	0	0	0	0	0	0	0	0	0	0	0	0	0	0	0	0
360.5	0	0	0	0	0	0	0	0	0	0	0	0	0	0	0	0	0	0
361	0	0	0	0	0	0	0	0	0	0	0	0	0	0	0	0	0	0
361.5	0	0	0	0	0	0	0	0	0	0	0	0	0	0	0	0	0	0
362	0	0	0	0	0	0	0	0	0	0	0	0	0	0	0	0	0	0
362.5	0	0	0	0	0	0	0	0	0	0	0	0	0	0	0	0	0	0
363	0	0	0	0	0	0	0	0	0	0	0	0	0	0	0	0	0	0
363.5	0	0	0	0	0	0	0	0	0	0	0	0	0	0	0	0	0	0
364	0	0	0	0	0	0	0	0	0	0	0	0	0	0	0	0	0	0
364.5	0	0	0	0	0	0	0	0	0	0	0	0	0	0	0	0	0	0
365	0	0	0	0	0	0	0	0	0	0	0	0	0	0	0	0	0	0
365.5	0	0	0	0	0	0	0	0	0	0	0	0	0	0	0	0	0	0
366	0	0	0	0	0	0	0	0	0	0	0	0	0	0	0	0	0	0
366.5	0	0	0	0	0	0	0	0	0	0	0	0	0	0	0	0	0	0
367	0	0	0	0	0	0	0	0	0	0	0	0	0	0	0	0	0	0
367.5	0	0	0	0	0	0	0	0	0	0	0	0	0	0	0	0	0	0
368	0	0	0	0	0	0	0	0	0	0	0	0	0	0	0	0	0	0
368.5	0	0	0	0	0	0	0	0	0	0	0	0	0	0	0	0	0	0
369	0	0	0	0	0	0	0	0	0	0	0	0	0	0	0	0	0	0
369.5	0	0	0	0	0	0	0	0	0	0	0	0	0	0	0	0	0	0
370	0	0	0	0	0	0	0	0	0	0	0	0	0	0	0	0	0	0
370.5	0	0	0	0	0	0	0	0	0	0	0	0	0	0	0	0	0	0
371	0	0	0	0	0	0	0	0	0	0	0	0	0	0	0	0	0	0
371.5	0	0	0	0	0	0	0	0	0	0	0	0	0	0	0	0	0	0
372	0	0	0	0	0	0	0.0067832	0	0	0	0	0	0	0	0	0	0	0
372.5	0	0	0	0	0	0	0.020563	0	0	0	0	0	0	0	0	0	0	0
373	0	0	0	0	0	0	0.037604	0	0	0	0	0	0	0	0	0	0	0
373.5	0	0	0	0	0	0	0.0849682	0	0	0	0	0	0	0	0	0	0	0
374	0	0	0	0	0	0	0.1776906	0	0	0	0	0	0	0	0	0	0	0
374.5	0	0	0	0	0	0	0.3362052	0	0	0	0	0	0	0	0	0	0	0
375	0	0	0	0	0	0	0.5448536	0	0	0	0	0	0	0	0	0	0	0
375.5	0	0	0	0	0	0	0.7712868	0	0	0	0	0	0	0	0	0	0	0
376	0	0	0	0	0	0	0.9107248	0	0	0	0	0	0	0	0	0	0	0
376.5	0	0	0	0	0	0	0.9747762	0	0	0	0	0	0	0	0	0	0	0
377	0	0	0	0	0	0	0.9926272	0	0	0	0	0	0	0	0	0	0	0
377.5	0	0	0	0	0	0	0.977731	0	0	0	0	0	0	0	0	0	0	0
378	0	0	0	0	0	0	0.9695652	0	0	0	0	0	0	0	0	0	0	0
378.5	0	0	0	0	0	0	0.946747	0	0	0	0	0	0	0	0	0	0	0
379	0	0	0	0	0	0	0.9082268	0	0	0	0	0	0	0	0	0	0	0
379.5	0	0	0	0	0	0	0.8654842	0	0	0	0	0	0	0	0	0	0	0
380	0	0	0	0	0	0	0.835745	0	0	0	0	0	0	0	0	0	0	0
380.5	0	0	0	0	0	0	0.7899106	0	0	0	0	0	0	0	0	0	0	0
381	0	0	0	0	0	0	0.7342264	0	0	0	0	0	0	0	0	0	0	0
381.5	0	0	0	0	0	0	0.6918792	0	0	0	0	0	0	0	0	0	0	0
382	0	0	0	0	0	0	0.654019	0	0	0	0	0	0	0	0	0	0	0
382.5	0	0	0	0	0	0	0.615749	0	0	0	0	0	0	0	0	0	0	0
383	0	0	0	0	0	0	0.5773424	0	0	0	0	0	0	0	0	0	0	0
383.5	0	0	0	0	0	0	0.5427292	0	0	0	0	0	0	0	0	0	0	0
384	0	0	0	0	0	0	0.4986256	0	0	0	0	0	0	0	0	0	0	0
384.5	0	0	0	0	0	0	0.441311	0	0	0	0	0	0	0	0	0	0	0
385	0	0	0	0	0	0	0.3554836	0	0	0	0	0	0	0	0	0	0	0
385.5	0	0	0	0	0	0	0.2443778	0	0	0	0	0	0	0	0	0	0	0
386	0	0	0	0	0	0	0.1386768	0	0	0	0	0	0	0	0	0	0	0
386.5	0	0	0	0	0	0	0.0663084	0.0006328	0	0	0	0	0	0	0	0	0	0
387	0	0	0	0	0	0	0.0255254	0.0017814	0	0	0	0	0	0	0	0	0	0
387.5	0	0	0	0	0	0	0.0117126	0.003953	0	0	0	0	0	0	0	0	0	0
388	0	0	0	0	0	0	0.003672	0.0056668	0	0	0	0	0	0	0	0	0	0
388.5	0	0	0	0	0	0	0.000418	0.0090758	0	0	0	0	0	0	0	0	0	0
389	0	0	0	0	0	0	0	0.0181214	0	0	0	0	0	0	0	0	0	0
389.5	0	0	0	0	0	0	0	0.0409082	0	0	0	0	0	0	0	0	0	0
390	0	0	0	0	0	0	0	0.0898504	0	0	0	0	0	0	0	0	0	0
390.5	0	0	0	0	0	0	0	0.1880526	0	0	0	0	0	0	0	0	0	0
391	0	0	0	0	0	0	0	0.3538104	0	0	0	0	0	0	0	0	0	0
391.5	0	0	0	0	0	0	0	0.5734976	0	0	0	0	0	0	0	0	0	0
392	0	0	0	0	0	0	0	0.7827406	0	0	0	0	0	0	0	0	0	0
392.5	0	0	0	0	0	0	0	0.9186612	0	0	0	0	0	0	0	0	0	0
393	0	0	0	0	0	0	0	0.963974	0	0	0	0	0	0	0	0	0	0
393.5	0	0	0	0	0	0	0	0.9665878	0	0	0	0	0	0	0	0	0	0
394	0	0	0	0	0	0	0	0.975271	0	0	0	0	0	0	0	0	0	0
394.5	0	0	0	0	0	0	0	0.9868294	0	0	0	0	0	0	0	0	0	0
395	0	0	0	0	0	0	0	0.9944538	0	0	0	0	0	0	0	0	0	0
395.5	0	0	0	0	0	0	0	0.9991568	0	0	0	0	0	0	0	0	0	0
396	0	0	0	0	0	0	0	0.9899104	0	0	0	0	0	0	0	0	0	0
396.5	0	0	0	0	0	0	0	0.9700472	0	0	0	0	0	0	0	0	0	0
397	0	0	0	0	0	0	0	0.944596	0	0	0	0	0	0	0	0	0	0
397.5	0	0	0	0	0	0	0	0.9158866	0	0	0	0	0	0	0	0	0	0
398	0	0	0	0	0	0	0	0.9035514	0	0	0	0	0	0	0	0	0	0
398.5	0	0	0	0	0	0	0	0.8925848	0	0	0	0	0	0	0	0	0	0
399	0	0	0	0	0	0	0	0.8575256	0	0	0	0	0	0	0	0	0	0
399.5	0	0	0	0	0	0	0	0.7806682	0	0	0	0	0	0	0	0	0	0
400	0	0	0	0	0	0	0	0.616511	0	0	0	0	0	0	0	0	0	0
400.5	0	0	0	0	0	0	0	0.4030496	0	0	0	0	0	0	0	0	0	0
401	0	0	0	0	0	0	0	0.2158742	0.0003488	0	0	0	0	0	0	0	0	0
401.5	0	0	0	0	0	0	0	0.0968026	0.0006504	0	0	0	0	0	0	0	0	0
402	0	0	0	0	0	0	0	0.041008	0.0008128	0	0	0	0	0	0	0	0	0
402.5	0	0	0	0	0	0	0	0.0166718	0.0018744	0	0	0	0	0	0	0	0	0
403	0	0	0	0	0	0	0	0.0078378	0.0027674	0	0	0	0	0	0	0	0	0
403.5	0	0	0	0	0	0	0	0.0038072	0.0041932	0	0	0	0	0	0	0	0	0
404	0	0	0	0	0	0	0	0.0014912	0.0135636	0	0	0	0	0	0	0	0	0
404.5	0	0	0	0	0	0	0	0.0002174	0.0328366	0	0	0	0	0	0	0	0	0
405	0	0	0	0	0	0	0	0	0.0844066	0	0	0	0	0	0	0	0	0
405.5	0	0	0	0	0	0	0	0	0.2001704	0	0	0	0	0	0	0	0	0
406	0	0	0	0	0	0	0	0	0.3710372	0	0	0	0	0	0	0	0	0
406.5	0	0	0	0	0	0	0	0	0.574586	0	0	0	0	0	0	0	0	0
407	0	0	0	0	0	0	0	0	0.7767548	0	0	0	0	0	0	0	0	0
407.5	0	0	0	0	0	0	0	0	0.8832094	0	0	0	0	0	0	0	0	0
408	0	0	0	0	0	0	0	0	0.9262836	0	0	0	0	0	0	0	0	0
408.5	0	0	0	0	0	0	0	0	0.9463888	0	0	0	0	0	0	0	0	0
409	0	0	0	0	0	0	0	0	0.9563912	0	0	0	0	0	0	0	0	0
409.5	0	0	0	0	0	0	0	0	0.9621274	0	0	0	0	0	0	0	0	0
410	0	0	0	0	0	0	0	0	0.9710414	0	0	0	0	0	0	0	0	0
410.5	0	0	0	0	0	0	0	0	0.9842542	0	0	0	0	0	0	0	0	0
411	0	0	0	0	0	0	0	0	0.989816	0	0	0	0	0	0	0	0	0
411.5	0	0	0	0	0	0	0	0	0.98468	0	0	0	0	0	0	0	0	0
412	0	0	0	0	0	0	0	0	0.9928488	0	0	0	0	0	0	0	0	0
412.5	0	0	0	0	0	0	0	0	0.9944318	0	0	0	0	0	0	0	0	0
413	0	0	0	0	0	0	0	0	0.9850404	0	0	0	0	0	0	0	0	0
413.5	0	0	0	0	0	0	0	0	0.9732176	0	0	0	0	0	0	0	0	0
414	0	0	0	0	0	0	0	0	0.9532152	0	0	0	0	0	0	0	0	0
414.5	0	0	0	0	0	0	0	0	0.9232364	0	0	0	0	0	0	0	0	0
415	0	0	0	0	0	0	0	0	0.8863278	0	0	0	0	0	0	0	0	0
415.5	0	0	0	0	0	0	0	0	0.8228358	0	0	0	0	0	0	0	0	0
416	0	0	0	0	0	0	0	0	0.7342932	0	0	0	0	0	0	0	0	0
416.5	0	0	0	0	0	0	0	0	0.5914138	0	0	0	0	0	0	0	0	0
417	0	0	0	0	0	0	0	0	0.3969278	0	0	0	0	0	0	0	0	0
417.5	0	0	0	0	0	0	0	0	0.2091902	0	0	0	0	0	0	0	0	0
418	0	0	0	0	0	0	0	0	0.0833428	0	0	0	0	0	0	0	0	0
418.5	0	0	0	0	0	0	0	0	0.0287994	0	0	0	0	0	0	0	0	0
419	0	0	0	0	0	0	0	0	0.0099316	0	0	0	0	0	0	0	0	0
419.5	0	0	0	0	0	0	0	0	0.0026094	0	0	0	0	0	0	0	0	0
420	0	0	0	0	0	0	0	0	0.0002908	0	0	0	0	0	0	0	0	0
420.5	0	0	0	0	0	0	0	0	0	0	0	0	0	0	0	0	0	0
421	0	0	0	0	0	0	0	0	0	0	0	0	0	0	0	0	0	0
421.5	0	0	0	0	0	0	0	0	0	0	0	0	0	0	0	0	0	0
422	0	0	0	0	0	0	0	0	0	0	0	0	0	0	0	0	0	0
422.5	0	0	0	0	0	0	0	0	0	0	0	0	0	0	0	0	0	0
423	0	0	0	0	0	0	0	0	0	0	0	0	0	0	0	0	0	0
423.5	0	0	0	0	0	0	0	0	0	0	0	0	0	0	0	0	0	0
424	0	0	0	0	0	0	0	0	0	0	0	0	0	0	0	0	0	0
424.5	0	0	0	0	0	0	0	0	0	0	0	0	0	0	0	0	0	0
425	0	0	0	0	0	0	0	0	0	0	0	0	0	0	0	0	0	0
425.5	0	0	0	0	0	0	0	0	0	0	0	0	0	0	0	0	0	0
426	0	0	0	0	0	0	0	0	0	0	0	0	0	0	0	0	0	0
426.5	0	0	0	0	0	0	0	0	0	0	0	0	0	0	0	0	0	0
427	0	0	0	0	0	0	0	0	0	0	0	0	0	0	0	0	0	0
427.5	0	0	0	0	0	0	0	0	0	0	0	0	0	0	0	0	0	0
428	0	0	0	0	0	0	0	0	0	0	0	0	0	0	0	0	0	0
428.5	0	0	0	0	0	0	0	0	0	0	0	0	0	0	0	0	0	0
429	0	0	0	0	0	0	0	0	0	0	0	0	0	0	0	0	0	0
429.5	0	0	0	0	0	0	0	0	0	0	0	0	0	0	0	0	0	0
430	0	0	0	0	0	0	0	0	0	0	0	0	0	0	0	0	0	0
430.5	0	0	0	0	0	0	0	0	0	0	0	0	0	0	0	0	0	0
431	0	0	0	0	0	0	0	0	0	0	0	0	0	0	0	0	0	0
431.5	0	0	0	0	0	0	0	0	0	0.000684	0	0	0	0	0	0	0	0
432	0	0	0	0	0	0	0	0	0	0.0013526	0	0	0	0	0	0	0	0
432.5	0	0	0	0	0	0	0	0	0	0.001969	0	0	0	0	0	0	0	0
433	0	0	0	0	0	0	0	0	0	0.0021784	0	0	0	0	0	0	0	0
433.5	0	0	0	0	0	0	0	0	0	0.0024328	0	0	0	0	0	0	0	0
434	0	0	0	0	0	0	0	0	0	0.0031566	0	0	0	0	0	0	0	0
434.5	0	0	0	0	0	0	0	0	0	0.0065078	0	0	0	0	0	0	0	0
435	0	0	0	0	0	0	0	0	0	0.0107544	0	0	0	0	0	0	0	0
435.5	0	0	0	0	0	0	0	0	0	0.0201762	0	0	0	0	0	0	0	0
436	0	0	0	0	0	0	0	0	0	0.0389688	0	0	0	0	0	0	0	0
436.5	0	0	0	0	0	0	0	0	0	0.0761592	0	0	0	0	0	0	0	0
437	0	0	0	0	0	0	0	0	0	0.1515264	0	0	0	0	0	0	0	0
437.5	0	0	0	0	0	0	0	0	0	0.2753168	0	0	0	0	0	0	0	0
438	0	0	0	0	0	0	0	0	0	0.4140028	0	0	0	0	0	0	0	0
438.5	0	0	0	0	0	0	0	0	0	0.5772452	0	0	0	0	0	0	0	0
439	0	0	0	0	0	0	0	0	0	0.7525536	0	0	0	0	0	0	0	0
439.5	0	0	0	0	0	0	0	0	0	0.9105718	0	0	0	0	0	0	0	0
440	0	0	0	0	0	0	0	0	0	0.9832954	0	0	0	0	0	0	0	0
440.5	0	0	0	0	0	0	0	0	0	0.9964846	0	0	0	0	0	0	0	0
441	0	0	0	0	0	0	0	0	0	0.996337	0	0	0	0	0	0	0	0
441.5	0	0	0	0	0	0	0	0	0	0.9992266	0	0	0	0	0	0	0	0
442	0	0	0	0	0	0	0	0	0	0.9912632	0	0	0	0	0	0	0	0
442.5	0	0	0	0	0	0	0	0	0	0.989971	0	0	0	0	0	0	0	0
443	0	0	0	0	0	0	0	0	0	0.9838012	0	0	0	0	0	0	0	0
443.5	0	0	0	0	0	0	0	0	0	0.971727	0	0	0	0	0	0	0	0
444	0	0	0	0	0	0	0	0	0	0.9582128	0	0	0	0	0	0	0	0
444.5	0	0	0	0	0	0	0	0	0	0.924205	0	0	0	0	0	0	0	0
445	0	0	0	0	0	0	0	0	0	0.8921752	0	0	0	0	0	0	0	0
445.5	0	0	0	0	0	0	0	0	0	0.8293782	0	0	0	0	0	0	0	0
446	0	0	0	0	0	0	0	0	0	0.727652	0	0	0	0	0	0	0	0
446.5	0	0	0	0	0	0	0	0	0	0.5896334	0	0	0	0	0	0	0	0
447	0	0	0	0	0	0	0	0	0	0.4337864	0	0	0	0	0	0	0	0
447.5	0	0	0	0	0	0	0	0	0	0.295055	0	0	0	0	0	0	0	0
448	0	0	0	0	0	0	0	0	0	0.1445964	0	0	0	0	0	0	0	0
448.5	0	0	0	0	0	0	0	0	0	0.0444438	0	0	0	0	0	0	0	0
449	0	0	0	0	0	0	0	0	0	0.0109874	0	0	0	0	0	0	0	0
449.5	0	0	0	0	0	0	0	0	0	0.0053076	0	0	0	0	0	0	0	0
450	0	0	0	0	0	0	0	0	0	0.002517	0	0	0	0	0	0	0	0
450.5	0	0	0	0	0	0	0	0	0	0.0010852	0	0	0	0	0	0	0	0
451	0	0	0	0	0	0	0	0	0	0.0001752	0	0	0	0	0	0	0	0
451.5	0	0	0	0	0	0	0	0	0	0	0	0	0	0	0	0	0	0
452	0	0	0	0	0	0	0	0	0	0	0	0	0	0	0	0	0	0
452.5	0	0	0	0	0	0	0	0	0	0	0	0	0	0	0	0	0	0
453	0	0	0	0	0	0	0	0	0	0	0	0	0	0	0	0	0	0
453.5	0	0	0	0	0	0	0	0	0	0	0	0	0	0	0	0	0	0
454	0	0	0	0	0	0	0	0	0	0	0	0	0	0	0	0	0	0
454.5	0	0	0	0	0	0	0	0	0	0	0	0	0	0	0	0	0	0
455	0	0	0	0	0	0	0	0	0	0	0	0	0	0	0	0	0	0
455.5	0	0	0	0	0	0	0	0	0	0	0	0	0	0	0	0	0	0
456	0	0	0	0	0	0	0	0	0	0	0	0	0	0	0	0	0	0
456.5	0	0	0	0	0	0	0	0	0	0	0	0	0	0	0	0	0	0
457	0	0	0	0	0	0	0	0	0	0	0	0	0	0	0	0	0	0
457.5	0	0	0	0	0	0	0	0	0	0	0	0	0	0	0	0	0	0
458	0	0	0	0	0	0	0	0	0	0	0	0	0	0	0	0	0	0
458.5	0	0	0	0	0	0	0	0	0	0	0	0	0	0	0	0	0	0
459	0	0	0	0	0	0	0	0	0	0	0	0	0	0	0	0	0	0
459.5	0	0	0	0	0	0	0	0	0	0	0	0	0	0	0	0	0	0
460	0	0	0	0	0	0	0	0	0	0	0	0	0	0	0	0	0	0
460.5	0	0	0	0	0	0	0	0	0	0	0	0	0	0	0	0	0	0
461	0	0	0	0	0	0	0	0	0	0	0	0	0	0	0	0	0	0
461.5	0	0	0	0	0	0	0	0	0	0	0	0	0	0	0	0	0	0
462	0	0	0	0	0	0	0	0	0	0	0	0	0	0	0	0	0	0
462.5	0	0	0	0	0	0	0	0	0	0	0	0	0	0	0	0	0	0
463	0	0	0	0	0	0	0	0	0	0	0	0	0	0	0	0	0	0
463.5	0	0	0	0	0	0	0	0	0	0	0	0	0	0	0	0	0	0
464	0	0	0	0	0	0	0	0	0	0	0	0	0	0	0	0	0	0
464.5	0	0	0	0	0	0	0	0	0	0	0	0	0	0	0	0	0	0
465	0	0	0	0	0	0	0	0	0	0	0	0	0	0	0	0	0	0
465.5	0	0	0	0	0	0	0	0	0	0	0	0	0	0	0	0	0	0
466	0	0	0	0	0	0	0	0	0	0	0	0	0	0	0	0	0	0
466.5	0	0	0	0	0	0	0	0	0	0	0	0	0	0	0	0	0	0
467	0	0	0	0	0	0	0	0	0	0	0	0	0	0	0	0	0	0
467.5	0	0	0	0	0	0	0	0	0	0	0	0	0	0	0	0	0	0
468	0	0	0	0	0	0	0	0	0	0	0	0	0	0	0	0	0	0
468.5	0	0	0	0	0	0	0	0	0	0	0	0	0	0	0	0	0	0
469	0	0	0	0	0	0	0	0	0	0	0	0	0	0	0	0	0	0
469.5	0	0	0	0	0	0	0	0	0	0	0	0	0	0	0	0	0	0
470	0	0	0	0	0	0	0	0	0	0	0	0	0	0	0	0	0	0
470.5	0	0	0	0	0	0	0	0	0	0	0	0	0	0	0	0	0	0
471	0	0	0	0	0	0	0	0	0	0	0	0	0	0	0	0	0	0
471.5	0	0	0	0	0	0	0	0	0	0	0	0	0	0	0	0	0	0
472	0	0	0	0	0	0	0	0	0	0	0	0	0	0	0	0	0	0
472.5	0	0	0	0	0	0	0	0	0	0	0	0	0	0	0	0	0	0
473	0	0	0	0	0	0	0	0	0	0	0	0	0	0	0	0	0	0
473.5	0	0	0	0	0	0	0	0	0	0	0	0	0	0	0	0	0	0
474	0	0	0	0	0	0	0	0	0	0	0	0	0	0	0	0	0	0
474.5	0	0	0	0	0	0	0	0	0	0	0	0	0	0	0	0	0	0
475	0	0	0	0	0	0	0	0	0	0	0	0	0	0	0	0	0	0
475.5	0	0	0	0	0	0	0	0	0	0	0	0	0	0	0	0	0	0
476	0	0	0	0	0	0	0	0	0	0	0	0	0	0	0	0	0	0
476.5	0	0	0	0	0	0	0	0	0	0	0	0	0	0	0	0	0	0
477	0	0	0	0	0	0	0	0	0	0	0	0	0	0	0	0	0	0
477.5	0	0	0	0	0	0	0	0	0	0	0	0	0	0	0	0	0	0
478	0	0	0	0	0	0	0	0	0	0	0	0	0	0	0	0	0	0
478.5	0	0	0	0	0	0	0	0	0	0	0	0	0	0	0	0	0	0
479	0	0	0	0	0	0	0	0	0	0	0	0	0	0	0	0	0	0
479.5	0	0	0	0	0	0	0	0	0	0	0	0	0	0	0	0	0	0
480	0	0	0	0	0	0	0	0	0	0	0	0	0	0	0	0	0	0
480.5	0	0	0	0	0	0	0	0	0	0	0.0025424	0	0	0	0	0	0	0
481	0	0	0	0	0	0	0	0	0	0	0.0052548	0	0	0	0	0	0	0
481.5	0	0	0	0	0	0	0	0	0	0	0.0079436	0	0	0	0	0	0	0
482	0	0	0	0	0	0	0	0	0	0	0.0139516	0	0	0	0	0	0	0
482.5	0	0	0	0	0	0	0	0	0	0	0.0222884	0	0	0	0	0	0	0
483	0	0	0	0	0	0	0	0	0	0	0.041719	0	0	0	0	0	0	0
483.5	0	0	0	0	0	0	0	0	0	0	0.0668722	0	0	0	0	0	0	0
484	0	0	0	0	0	0	0	0	0	0	0.1143806	0	0	0	0	0	0	0
484.5	0	0	0	0	0	0	0	0	0	0	0.2040756	0	0	0	0	0	0	0
485	0	0	0	0	0	0	0	0	0	0	0.288542	0	0	0	0	0	0	0
485.5	0	0	0	0	0	0	0	0	0	0	0.419938	0	0	0	0	0	0	0
486	0	0	0	0	0	0	0	0	0	0	0.5324912	0	0	0	0	0	0	0
486.5	0	0	0	0	0	0	0	0	0	0	0.667388	0	0	0	0	0	0	0
487	0	0	0	0	0	0	0	0	0	0	0.7461212	0	0	0	0	0	0	0
487.5	0	0	0	0	0	0	0	0	0	0	0.7894284	0	0	0	0	0	0	0
488	0	0	0	0	0	0	0	0	0	0	0.8217278	0	0	0	0	0	0	0
488.5	0	0	0	0	0	0	0	0	0	0	0.8702082	0	0	0	0	0	0	0
489	0	0	0	0	0	0	0	0	0	0	0.9226964	0	0	0	0	0	0	0
489.5	0	0	0	0	0	0	0	0	0	0	0.9630546	0	0	0	0	0	0	0
490	0	0	0	0	0	0	0	0	0	0	0.9885634	0	0	0	0	0	0	0
490.5	0	0	0	0	0	0	0	0	0	0	0.9977818	0	0	0	0	0	0	0
491	0	0	0	0	0	0	0	0	0	0	0.9961726	0	0	0	0	0	0	0
491.5	0	0	0	0	0	0	0	0	0	0	0.9987856	0	0	0	0	0	0	0
492	0	0	0	0	0	0	0	0	0	0	0.984281	0	0	0	0	0	0	0
492.5	0	0	0	0	0	0	0	0	0	0	0.9542776	0	0	0	0	0	0	0
493	0	0	0	0	0	0	0	0	0	0	0.9226846	0	0	0	0	0	0	0
493.5	0	0	0	0	0	0	0	0	0	0	0.8722492	0	0	0	0	0	0	0
494	0	0	0	0	0	0	0	0	0	0	0.8220316	0	0	0	0	0	0	0
494.5	0	0	0	0	0	0	0	0	0	0	0.7218148	0	0	0	0	0	0	0
495	0	0	0	0	0	0	0	0	0	0	0.6227298	0	0	0	0	0	0	0
495.5	0	0	0	0	0	0	0	0	0	0	0.4975276	0	0	0	0	0	0	0
496	0	0	0	0	0	0	0	0	0	0	0.365627	0	0	0	0	0	0	0
496.5	0	0	0	0	0	0	0	0	0	0	0.23391	0	0	0	0	0	0	0
497	0	0	0	0	0	0	0	0	0	0	0.1245462	0	0	0	0	0	0	0
497.5	0	0	0	0	0	0	0	0	0	0	0.0654302	0	0	0	0	0	0	0
498	0	0	0	0	0	0	0	0	0	0	0.030076	0	0	0	0	0	0	0
498.5	0	0	0	0	0	0	0	0	0	0	0.013635	0	0	0	0	0	0	0
499	0	0	0	0	0	0	0	0	0	0	0.0049582	0	0	0	0	0	0	0
499.5	0	0	0	0	0	0	0	0	0	0	0.0021876	0	0	0	0	0	0	0
500	0	0	0	0	0	0	0	0	0	0	0.0016106	0	0	0	0	0	0	0
500.5	0	0	0	0	0	0	0	0	0	0	0.0005486	0	0	0	0	0	0	0
501	0	0	0	0	0	0	0	0	0	0	6.00E-05	0	0	0	0	0	0	0
501.5	0	0	0	0	0	0	0	0	0	0	0	0	0	0	0	0	0	0
502	0	0	0	0	0	0	0	0	0	0	0	0	0	0	0	0	0	0
502.5	0	0	0	0	0	0	0	0	0	0	0	0	0	0	0	0	0	0
503	0	0	0	0	0	0	0	0	0	0	0	0	0	0	0	0	0	0
503.5	0	0	0	0	0	0	0	0	0	0	0	0	0	0	0	0	0	0
504	0	0	0	0	0	0	0	0	0	0	0	0	0	0	0	0	0	0
504.5	0	0	0	0	0	0	0	0	0	0	0	0	0	0	0	0	0	0
505	0	0	0	0	0	0	0	0	0	0	0	0	0	0	0	0	0	0
505.5	0	0	0	0	0	0	0	0	0	0	0	0	0	0	0	0	0	0
506	0	0	0	0	0	0	0	0	0	0	0	0	0	0	0	0	0	0
506.5	0	0	0	0	0	0	0	0	0	0	0	0	0	0	0	0	0	0
507	0	0	0	0	0	0	0	0	0	0	0	0	0	0	0	0	0	0
507.5	0	0	0	0	0	0	0	0	0	0	0	0	0	0	0	0	0	0
508	0	0	0	0	0	0	0	0	0	0	0	0	0	0	0	0	0	0
508.5	0	0	0	0	0	0	0	0	0	0	0	0	0	0	0	0	0	0
509	0	0	0	0	0	0	0	0	0	0	0	0	0	0	0	0	0	0
509.5	0	0	0	0	0	0	0	0	0	0	0	0	0	0	0	0	0	0
510	0	0	0	0	0	0	0	0	0	0	0	0	0	0	0	0	0	0
510.5	0	0	0	0	0	0	0	0	0	0	0	0	0	0	0	0	0	0
511	0	0	0	0	0	0	0	0	0	0	0	0	0	0	0	0	0	0
511.5	0	0	0	0	0	0	0	0	0	0	0	0	0	0	0	0	0	0
512	0	0	0	0	0	0	0	0	0	0	0	0	0	0	0	0	0	0
512.5	0	0	0	0	0	0	0	0	0	0	0	0	0	0	0	0	0	0
513	0	0	0	0	0	0	0	0	0	0	0	0	0	0	0	0	0	0
513.5	0	0	0	0	0	0	0	0	0	0	0	0	0	0	0	0	0	0
514	0	0	0	0	0	0	0	0	0	0	0	0	0	0	0	0	0	0
514.5	0	0	0	0	0	0	0	0	0	0	0	0	0	0	0	0	0	0
515	0	0	0	0	0	0	0	0	0	0	0	0	0	0	0	0	0	0
515.5	0	0	0	0	0	0	0	0	0	0	0	0	0	0	0	0	0	0
516	0	0	0	0	0	0	0	0	0	0	0	0	0	0	0	0	0	0
516.5	0	0	0	0	0	0	0	0	0	0	0	0	0	0	0	0	0	0
517	0	0	0	0	0	0	0	0	0	0	0	0	0	0	0	0	0	0
517.5	0	0	0	0	0	0	0	0	0	0	0	0	0	0	0	0	0	0
518	0	0	0	0	0	0	0	0	0	0	0	0	0	0	0	0	0	0
518.5	0	0	0	0	0	0	0	0	0	0	0	0	0	0	0	0	0	0
519	0	0	0	0	0	0	0	0	0	0	0	0	0	0	0	0	0	0
519.5	0	0	0	0	0	0	0	0	0	0	0	0	0	0	0	0	0	0
520	0	0	0	0	0	0	0	0	0	0	0	0	0	0	0	0	0	0
520.5	0	0	0	0	0	0	0	0	0	0	0	0	0	0	0	0	0	0
521	0	0	0	0	0	0	0	0	0	0	0	0	0	0	0	0	0	0
521.5	0	0	0	0	0	0	0	0	0	0	0	0	0	0	0	0	0	0
522	0	0	0	0	0	0	0	0	0	0	0	0	0	0	0	0	0	0
522.5	0	0	0	0	0	0	0	0	0	0	0	0	0	0	0	0	0	0
523	0	0	0	0	0	0	0	0	0	0	0	0	0	0	0	0	0	0
523.5	0	0	0	0	0	0	0	0	0	0	0	0	0	0	0	0	0	0
524	0	0	0	0	0	0	0	0	0	0	0	0.0014528	0	0	0	0	0	0
524.5	0	0	0	0	0	0	0	0	0	0	0	0.0048712	0	0	0	0	0	0
525	0	0	0	0	0	0	0	0	0	0	0	0.008159	0	0	0	0	0	0
525.5	0	0	0	0	0	0	0	0	0	0	0	0.0140764	0	0	0	0	0	0
526	0	0	0	0	0	0	0	0	0	0	0	0.0300292	0	0	0	0	0	0
526.5	0	0	0	0	0	0	0	0	0	0	0	0.0639422	0	0	0	0	0	0
527	0	0	0	0	0	0	0	0	0	0	0	0.1183476	0	0	0	0	0	0
527.5	0	0	0	0	0	0	0	0	0	0	0	0.2150852	0	0	0	0	0	0
528	0	0	0	0	0	0	0	0	0	0	0	0.375718	0	0	0	0	0	0
528.5	0	0	0	0	0	0	0	0	0	0	0	0.5322052	0	0	0	0	0	0
529	0	0	0	0	0	0	0	0	0	0	0	0.7198824	0	0	0	0	0	0
529.5	0	0	0	0	0	0	0	0	0	0	0	0.8813822	0	0	0	0	0	0
530	0	0	0	0	0	0	0	0	0	0	0	0.9398672	0	0	0	0	0	0
530.5	0	0	0	0	0	0	0	0	0	0	0	0.964204	0	0	0	0	0	0
531	0	0	0	0	0	0	0	0	0	0	0	0.9563436	0	0	0	0	0	0
531.5	0	0	0	0	0	0	0	0	0	0	0	0.9457724	0	0	0	0	0	0
532	0	0	0	0	0	0	0	0	0	0	0	0.9414968	0	0	0	0	0	0
532.5	0	0	0	0	0	0	0	0	0	0	0	0.9587972	0	0	0	0	0	0
533	0	0	0	0	0	0	0	0	0	0	0	0.9818368	0	0	0	0	0	0
533.5	0	0	0	0	0	0	0	0	0	0	0	0.99487	0	0	0	0	0	0
534	0	0	0	0	0	0	0	0	0	0	0	0.9979008	0	0	0	0	0	0
534.5	0	0	0	0	0	0	0	0	0	0	0	0.9902172	0	0	0	0	0	0
535	0	0	0	0	0	0	0	0	0	0	0	0.9768412	0	0	0	0	0	0
535.5	0	0	0	0	0	0	0	0	0	0	0	0.965744	0	0	0	0	0	0
536	0	0	0	0	0	0	0	0	0	0	0	0.9306684	0	0	0	0	0	0
536.5	0	0	0	0	0	0	0	0	0	0	0	0.877127	0	0	0	0	0	0
537	0	0	0	0	0	0	0	0	0	0	0	0.794693	0	0	0	0	0	0
537.5	0	0	0	0	0	0	0	0	0	0	0	0.6689246	0	0	0	0	0	0
538	0	0	0	0	0	0	0	0	0	0	0	0.525667	0	0	0	0	0	0
538.5	0	0	0	0	0	0	0	0	0	0	0	0.3639244	0	0	0	0	0	0
539	0	0	0	0	0	0	0	0	0	0	0	0.1818686	0	0	0	0	0	0
539.5	0	0	0	0	0	0	0	0	0	0	0	0.0603686	0	0	0	0	0	0
540	0	0	0	0	0	0	0	0	0	0	0	0.0198998	0	0	0	0	0	0
540.5	0	0	0	0	0	0	0	0	0	0	0	0.0061836	0	0	0	0	0	0
541	0	0	0	0	0	0	0	0	0	0	0	0.0016254	0	0	0	0	0	0
541.5	0	0	0	0	0	0	0	0	0	0	0	0.0006168	0	0	0	0	0	0
542	0	0	0	0	0	0	0	0	0	0	0	0.0001022	0	0	0	0	0	0
542.5	0	0	0	0	0	0	0	0	0	0	0	0	0	0	0	0	0	0
543	0	0	0	0	0	0	0	0	0	0	0	0	0	0	0	0	0	0
543.5	0	0	0	0	0	0	0	0	0	0	0	0	0	0	0	0	0	0
544	0	0	0	0	0	0	0	0	0	0	0	0	0	0	0	0	0	0
544.5	0	0	0	0	0	0	0	0	0	0	0	0	0	0	0	0	0	0
545	0	0	0	0	0	0	0	0	0	0	0	0	0	0	0	0	0	0
545.5	0	0	0	0	0	0	0	0	0	0	0	0	0	0	0	0	0	0
546	0	0	0	0	0	0	0	0	0	0	0	0	0	0	0	0	0	0
546.5	0	0	0	0	0	0	0	0	0	0	0	0	0.0048152	0	0	0	0	0
547	0	0	0	0	0	0	0	0	0	0	0	0	0.0103574	0	0	0	0	0
547.5	0	0	0	0	0	0	0	0	0	0	0	0	0.018266	0	0	0	0	0
548	0	0	0	0	0	0	0	0	0	0	0	0	0.046424	0.0075136	0	0	0	0
548.5	0	0	0	0	0	0	0	0	0	0	0	0	0.1057362	0.012804	0	0	0	0
549	0	0	0	0	0	0	0	0	0	0	0	0	0.2085886	0.0200714	0	0	0	0
549.5	0	0	0	0	0	0	0	0	0	0	0	0	0.3547624	0.046575	0	0	0	0
550	0	0	0	0	0	0	0	0	0	0	0	0	0.5453722	0.1116224	0	0	0	0
550.5	0	0	0	0	0	0	0	0	0	0	0	0	0.7380276	0.2367088	0	0	0	0
551	0	0	0	0	0	0	0	0	0	0	0	0	0.8587816	0.3881224	0	0	0	0
551.5	0	0	0	0	0	0	0	0	0	0	0	0	0.9136256	0.5640378	0	0	0	0
552	0	0	0	0	0	0	0	0	0	0	0	0	0.9268672	0.739938	0	0	0	0
552.5	0	0	0	0	0	0	0	0	0	0	0	0	0.9232448	0.8575954	0	0	0	0
553	0	0	0	0	0	0	0	0	0	0	0	0	0.9257276	0.9136482	0	0	0	0
553.5	0	0	0	0	0	0	0	0	0	0	0	0	0.92598	0.9211948	0	0	0	0
554	0	0	0	0	0	0	0	0	0	0	0	0	0.9427066	0.9215766	0	0	0	0
554.5	0	0	0	0	0	0	0	0	0	0	0	0	0.9757932	0.9489874	0	0	0	0
555	0	0	0	0	0	0	0	0	0	0	0	0	0.9966018	0.9773424	0	0	0	0
555.5	0	0	0	0	0	0	0	0	0	0	0	0	0.9872744	0.9871082	0	0	0	0
556	0	0	0	0	0	0	0	0	0	0	0	0	0.9614706	0.9890862	0	0	0	0
556.5	0	0	0	0	0	0	0	0	0	0	0	0	0.9410998	0.990543	0	0	0	0
557	0	0	0	0	0	0	0	0	0	0	0	0	0.9233922	0.9973456	0	0	0	0
557.5	0	0	0	0	0	0	0	0	0	0	0	0	0.8976842	0.9848938	0	0	0	0
558	0	0	0	0	0	0	0	0	0	0	0	0	0.886634	0.9672278	0	0	0	0
558.5	0	0	0	0	0	0	0	0	0	0	0	0	0.850755	0.936711	0	0	0	0
559	0	0	0	0	0	0	0	0	0	0	0	0	0.7828106	0.9222164	0	0	0	0
559.5	0	0	0	0	0	0	0	0	0	0	0	0	0.6540562	0.9020286	0	0	0	0
560	0	0	0	0	0	0	0	0	0	0	0	0	0.4772006	0.8486452	0	0	0	0
560.5	0	0	0	0	0	0	0	0	0	0	0	0	0.2951318	0.7595264	0	0	0	0
561	0	0	0	0	0	0	0	0	0	0	0	0	0.1305568	0.6210148	0	0	0	0
561.5	0	0	0	0	0	0	0	0	0	0	0	0	0.0507316	0.460922	0	0	0	0
562	0	0	0	0	0	0	0	0	0	0	0	0	0.0113904	0.2785708	0	0	0	0
562.5	0	0	0	0	0	0	0	0	0	0	0	0	0.003815	0.137253	0	0	0	0
563	0	0	0	0	0	0	0	0	0	0	0	0	0.0007268	0.045785	0	0	0	0
563.5	0	0	0	0	0	0	0	0	0	0	0	0	0	0.0131292	0	0	0	0
564	0	0	0	0	0	0	0	0	0	0	0	0	0	0.0026022	0	0	0	0
564.5	0	0	0	0	0	0	0	0	0	0	0	0	0	0.0001976	0	0	0	0
565	0	0	0	0	0	0	0	0	0	0	0	0	0	0	0	0	0	0
565.5	0	0	0	0	0	0	0	0	0	0	0	0	0	0	0	0	0	0
566	0	0	0	0	0	0	0	0	0	0	0	0	0	0	0	0	0	0
566.5	0	0	0	0	0	0	0	0	0	0	0	0	0	0	0	0	0	0
567	0	0	0	0	0	0	0	0	0	0	0	0	0	0	0	0	0	0
567.5	0	0	0	0	0	0	0	0	0	0	0	0	0	0	0	0	0	0
568	0	0	0	0	0	0	0	0	0	0	0	0	0	0	0	0	0	0
568.5	0	0	0	0	0	0	0	0	0	0	0	0	0	0	0	0	0	0
569	0	0	0	0	0	0	0	0	0	0	0	0	0	0	0	0	0	0
569.5	0	0	0	0	0	0	0	0	0	0	0	0	0	0	0	0	0	0
570	0	0	0	0	0	0	0	0	0	0	0	0	0	0	0	0	0	0
570.5	0	0	0	0	0	0	0	0	0	0	0	0	0	0	0	0	0	0
571	0	0	0	0	0	0	0	0	0	0	0	0	0	0	0	0	0	0
571.5	0	0	0	0	0	0	0	0	0	0	0	0	0	0	0	0	0	0
572	0	0	0	0	0	0	0	0	0	0	0	0	0	0	0	0	0	0
572.5	0	0	0	0	0	0	0	0	0	0	0	0	0	0	0	0	0	0
573	0	0	0	0	0	0	0	0	0	0	0	0	0	0	0	0	0	0
573.5	0	0	0	0	0	0	0	0	0	0	0	0	0	0	0	0	0	0
574	0	0	0	0	0	0	0	0	0	0	0	0	0	0	0	0	0	0
574.5	0	0	0	0	0	0	0	0	0	0	0	0	0	0	0	0	0	0
575	0	0	0	0	0	0	0	0	0	0	0	0	0	0	0	0	0	0
575.5	0	0	0	0	0	0	0	0	0	0	0	0	0	0	0	0	0	0
576	0	0	0	0	0	0	0	0	0	0	0	0	0	0	0	0	0	0
576.5	0	0	0	0	0	0	0	0	0	0	0	0	0	0	0	0	0	0
577	0	0	0	0	0	0	0	0	0	0	0	0	0	0	0	0	0	0
577.5	0	0	0	0	0	0	0	0	0	0	0	0	0	0	0	0	0	0
578	0	0	0	0	0	0	0	0	0	0	0	0	0	0	0	0	0	0
578.5	0	0	0	0	0	0	0	0	0	0	0	0	0	0	0	0	0	0
579	0	0	0	0	0	0	0	0	0	0	0	0	0	0	0	0	0	0
579.5	0	0	0	0	0	0	0	0	0	0	0	0	0	0	0	0	0	0
580	0	0	0	0	0	0	0	0	0	0	0	0	0	0	0	0	0	0
580.5	0	0	0	0	0	0	0	0	0	0	0	0	0	0	0	0	0	0
581	0	0	0	0	0	0	0	0	0	0	0	0	0	0	0	0	0	0
581.5	0	0	0	0	0	0	0	0	0	0	0	0	0	0	0	0	0	0
582	0	0	0	0	0	0	0	0	0	0	0	0	0	0	0	0	0	0
582.5	0	0	0	0	0	0	0	0	0	0	0	0	0	0	0	0	0	0
583	0	0	0	0	0	0	0	0	0	0	0	0	0	0	0	0	0	0
583.5	0	0	0	0	0	0	0	0	0	0	0	0	0	0	0	0	0	0
584	0	0	0	0	0	0	0	0	0	0	0	0	0	0	0	0	0	0
584.5	0	0	0	0	0	0	0	0	0	0	0	0	0	0	0	0	0	0
585	0	0	0	0	0	0	0	0	0	0	0	0	0	0	0	0	0	0
585.5	0	0	0	0	0	0	0	0	0	0	0	0	0	0	0	0	0	0
586	0	0	0	0	0	0	0	0	0	0	0	0	0	0	0	0	0	0
586.5	0	0	0	0	0	0	0	0	0	0	0	0	0	0	0	0	0	0
587	0	0	0	0	0	0	0	0	0	0	0	0	0	0	0	0	0	0
587.5	0	0	0	0	0	0	0	0	0	0	0	0	0	0	0	0	0	0
588	0	0	0	0	0	0	0	0	0	0	0	0	0	0	0	0	0	0
588.5	0	0	0	0	0	0	0	0	0	0	0	0	0	0	0	0	0	0
589	0	0	0	0	0	0	0	0	0	0	0	0	0	0	0	0	0	0
589.5	0	0	0	0	0	0	0	0	0	0	0	0	0	0	0	0	0	0
590	0	0	0	0	0	0	0	0	0	0	0	0	0	0	0	0	0	0
590.5	0	0	0	0	0	0	0	0	0	0	0	0	0	0	0	0	0	0
591	0	0	0	0	0	0	0	0	0	0	0	0	0	0	0	0	0	0
591.5	0	0	0	0	0	0	0	0	0	0	0	0	0	0	0	0	0	0
592	0	0	0	0	0	0	0	0	0	0	0	0	0	0	0	0	0	0
592.5	0	0	0	0	0	0	0	0	0	0	0	0	0	0	0	0	0	0
593	0	0	0	0	0	0	0	0	0	0	0	0	0	0	0	0	0	0
593.5	0	0	0	0	0	0	0	0	0	0	0	0	0	0	0	0	0	0
594	0	0	0	0	0	0	0	0	0	0	0	0	0	0	0	0	0	0
594.5	0	0	0	0	0	0	0	0	0	0	0	0	0	0	0	0	0	0
595	0	0	0	0	0	0	0	0	0	0	0	0	0	0	0	0	0	0
595.5	0	0	0	0	0	0	0	0	0	0	0	0	0	0	0	0	0	0
596	0	0	0	0	0	0	0	0	0	0	0	0	0	0	0	0	0	0
596.5	0	0	0	0	0	0	0	0	0	0	0	0	0	0	0	0	0	0
597	0	0	0	0	0	0	0	0	0	0	0	0	0	0	0	0	0	0
597.5	0	0	0	0	0	0	0	0	0	0	0	0	0	0	0	0	0	0
598	0	0	0	0	0	0	0	0	0	0	0	0	0	0	0	0	0	0
598.5	0	0	0	0	0	0	0	0	0	0	0	0	0	0	0	0	0	0
599	0	0	0	0	0	0	0	0	0	0	0	0	0	0	0	0	0	0
599.5	0	0	0	0	0	0	0	0	0	0	0	0	0	0	0	0	0	0
600	0	0	0	0	0	0	0	0	0	0	0	0	0	0	0	0	0	0
600.5	0	0	0	0	0	0	0	0	0	0	0	0	0	0	0	0	0	0
601	0	0	0	0	0	0	0	0	0	0	0	0	0	0	0	0	0	0
601.5	0	0	0	0	0	0	0	0	0	0	0	0	0	0	0	0	0	0
602	0	0	0	0	0	0	0	0	0	0	0	0	0	0	0	0	0	0
602.5	0	0	0	0	0	0	0	0	0	0	0	0	0	0	0	0	0	0
603	0	0	0	0	0	0	0	0	0	0	0	0	0	0	0	0	0	0
603.5	0	0	0	0	0	0	0	0	0	0	0	0	0	0	0	0	0	0
604	0	0	0	0	0	0	0	0	0	0	0	0	0	0	0	0	0	0
604.5	0	0	0	0	0	0	0	0	0	0	0	0	0	0	0	0	0	0
605	0	0	0	0	0	0	0	0	0	0	0	0	0	0	0	0	0	0
605.5	0	0	0	0	0	0	0	0	0	0	0	0	0	0	0	0	0	0
606	0	0	0	0	0	0	0	0	0	0	0	0	0	0	0	0	0	0
606.5	0	0	0	0	0	0	0	0	0	0	0	0	0	0	0	0	0	0
607	0	0	0	0	0	0	0	0	0	0	0	0	0	0	0	0	0	0
607.5	0	0	0	0	0	0	0	0	0	0	0	0	0	0	0	0	0	0
608	0	0	0	0	0	0	0	0	0	0	0	0	0	0	0	0	0	0
608.5	0	0	0	0	0	0	0	0	0	0	0	0	0	0	0	0	0	0
609	0	0	0	0	0	0	0	0	0	0	0	0	0	0	0	0	0	0
609.5	0	0	0	0	0	0	0	0	0	0	0	0	0	0	0	0	0	0
610	0	0	0	0	0	0	0	0	0	0	0	0	0	0	0	0	0	0
610.5	0	0	0	0	0	0	0	0	0	0	0	0	0	0	0	0	0	0
611	0	0	0	0	0	0	0	0	0	0	0	0	0	0	0	0	0	0
611.5	0	0	0	0	0	0	0	0	0	0	0	0	0	0	0	0	0	0
612	0	0	0	0	0	0	0	0	0	0	0	0	0	0	0	0	0	0
612.5	0	0	0	0	0	0	0	0	0	0	0	0	0	0	0	0	0	0
613	0	0	0	0	0	0	0	0	0	0	0	0	0	0	0	0	0	0
613.5	0	0	0	0	0	0	0	0	0	0	0	0	0	0	0	0	0	0
614	0	0	0	0	0	0	0	0	0	0	0	0	0	0	0	0	0	0
614.5	0	0	0	0	0	0	0	0	0	0	0	0	0	0	0	0	0	0
615	0	0	0	0	0	0	0	0	0	0	0	0	0	0	0	0	0	0
615.5	0	0	0	0	0	0	0	0	0	0	0	0	0	0	0	0	0	0
616	0	0	0	0	0	0	0	0	0	0	0	0	0	0	0	0	0	0
616.5	0	0	0	0	0	0	0	0	0	0	0	0	0	0	0	0	0	0
617	0	0	0	0	0	0	0	0	0	0	0	0	0	0	0	0	0	0
617.5	0	0	0	0	0	0	0	0	0	0	0	0	0	0	0	0	0	0
618	0	0	0	0	0	0	0	0	0	0	0	0	0	0	0	0	0	0
618.5	0	0	0	0	0	0	0	0	0	0	0	0	0	0	0	0	0	0
619	0	0	0	0	0	0	0	0	0	0	0	0	0	0	0	0	0	0
619.5	0	0	0	0	0	0	0	0	0	0	0	0	0	0	0	0	0	0
620	0	0	0	0	0	0	0	0	0	0	0	0	0	0	0	0	0	0
620.5	0	0	0	0	0	0	0	0	0	0	0	0	0	0	0	0	0	0
621	0	0	0	0	0	0	0	0	0	0	0	0	0	0	0	0	0	0
621.5	0	0	0	0	0	0	0	0	0	0	0	0	0	0	0	0	0	0
622	0	0	0	0	0	0	0	0	0	0	0	0	0	0	0	0	0	0
622.5	0	0	0	0	0	0	0	0	0	0	0	0	0	0	0	0	0	0
623	0	0	0	0	0	0	0	0	0	0	0	0	0	0	0	0	0	0
623.5	0	0	0	0	0	0	0	0	0	0	0	0	0	0	0	0	0	0
624	0	0	0	0	0	0	0	0	0	0	0	0	0	0	0	0	0	0
624.5	0	0	0	0	0	0	0	0	0	0	0	0	0	0	0	0	0	0
625	0	0	0	0	0	0	0	0	0	0	0	0	0	0	0	0	0	0
625.5	0	0	0	0	0	0	0	0	0	0	0	0	0	0	0	0	0	0
626	0	0	0	0	0	0	0	0	0	0	0	0	0	0	0	0	0	0
626.5	0	0	0	0	0	0	0	0	0	0	0	0	0	0	0	0	0	0
627	0	0	0	0	0	0	0	0	0	0	0	0	0	0	0	0	0	0
627.5	0	0	0	0	0	0	0	0	0	0	0	0	0	0	0	0	0	0
628	0	0	0	0	0	0	0	0	0	0	0	0	0	0	0	0	0	0
628.5	0	0	0	0	0	0	0	0	0	0	0	0	0	0	0	0	0	0
629	0	0	0	0	0	0	0	0	0	0	0	0	0	0	0	0	0	0
629.5	0	0	0	0	0	0	0	0	0	0	0	0	0	0	0	0	0	0
630	0	0	0	0	0	0	0	0	0	0	0	0	0	0	0	0	0	0
630.5	0	0	0	0	0	0	0	0	0	0	0	0	0	0	0	0	0	0
631	0	0	0	0	0	0	0	0	0	0	0	0	0	0	0	0	0	0
631.5	0	0	0	0	0	0	0	0	0	0	0	0	0	0	0	0	0	0
632	0	0	0	0	0	0	0	0	0	0	0	0	0	0	0	0	0	0
632.5	0	0	0	0	0	0	0	0	0	0	0	0	0	0	0	0	0	0
633	0	0	0	0	0	0	0	0	0	0	0	0	0	0	0	0	0	0
633.5	0	0	0	0	0	0	0	0	0	0	0	0	0	0	0	0	0	0
634	0	0	0	0	0	0	0	0	0	0	0	0	0	0	0	0	0	0
634.5	0	0	0	0	0	0	0	0	0	0	0	0	0	0	0	0	0	0
635	0	0	0	0	0	0	0	0	0	0	0	0	0	0	0	0	0	0
635.5	0	0	0	0	0	0	0	0	0	0	0	0	0	0	0	0	0	0
636	0	0	0	0	0	0	0	0	0	0	0	0	0	0	0	0	0	0
636.5	0	0	0	0	0	0	0	0	0	0	0	0	0	0	0	0	0	0
637	0	0	0	0	0	0	0	0	0	0	0	0	0	0	0	0	0	0
637.5	0	0	0	0	0	0	0	0	0	0	0	0	0	0	0	0	0	0
638	0	0	0	0	0	0	0	0	0	0	0	0	0	0	0	0	0	0
638.5	0	0	0	0	0	0	0	0	0	0	0	0	0	0	0	0	0	0
639	0	0	0	0	0	0	0	0	0	0	0	0	0	0	0	0	0	0
639.5	0	0	0	0	0	0	0	0	0	0	0	0	0	0	0	0	0	0
640	0	0	0	0	0	0	0	0	0	0	0	0	0	0	0	0	0	0
640.5	0	0	0	0	0	0	0	0	0	0	0	0	0	0	0	0	0	0
641	0	0	0	0	0	0	0	0	0	0	0	0	0	0	0	0	0	0
641.5	0	0	0	0	0	0	0	0	0	0	0	0	0	0	0	0	0	0
642	0	0	0	0	0	0	0	0	0	0	0	0	0	0	0	0	0	0
642.5	0	0	0	0	0	0	0	0	0	0	0	0	0	0	0	0	0	0
643	0	0	0	0	0	0	0	0	0	0	0	0	0	0	0	0	0	0
643.5	0	0	0	0	0	0	0	0	0	0	0	0	0	0	0	0	0	0
644	0	0	0	0	0	0	0	0	0	0	0	0	0	0	0	0	0	0
644.5	0	0	0	0	0	0	0	0	0	0	0	0	0	0	0	0	0	0
645	0	0	0	0	0	0	0	0	0	0	0	0	0	0	0	0	0	0
645.5	0	0	0	0	0	0	0	0	0	0	0	0	0	0	0	0	0	0
646	0	0	0	0	0	0	0	0	0	0	0	0	0	0	0	0	0	0
646.5	0	0	0	0	0	0	0	0	0	0	0	0	0	0	0	0	0	0
647	0	0	0	0	0	0	0	0	0	0	0	0	0	0	0	0	0	0
647.5	0	0	0	0	0	0	0	0	0	0	0	0	0	0	0	0	0	0
648	0	0	0	0	0	0	0	0	0	0	0	0	0	0	0	0	0	0
648.5	0	0	0	0	0	0	0	0	0	0	0	0	0	0	0	0	0	0
649	0	0	0	0	0	0	0	0	0	0	0	0	0	0	0	0	0	0
649.5	0	0	0	0	0	0	0	0	0	0	0	0	0	0	0	0	0	0
650	0	0	0	0	0	0	0	0	0	0	0	0	0	0	0	0	0	0
650.5	0	0	0	0	0	0	0	0	0	0	0	0	0	0	0	0	0	0
651	0	0	0	0	0	0	0	0	0	0	0	0	0	0	0.0001288	0	0	0
651.5	0	0	0	0	0	0	0	0	0	0	0	0	0	0	0.0003314	0	0	0
652	0	0	0	0	0	0	0	0	0	0	0	0	0	0	0.0007572	0	0	0
652.5	0	0	0	0	0	0	0	0	0	0	0	0	0	0	0.001061	0	0	0
653	0	0	0	0	0	0	0	0	0	0	0	0	0	0	0.001117	0	0	0
653.5	0	0	0	0	0	0	0	0	0	0	0	0	0	0	0.0011108	0	0	0
654	0	0	0	0	0	0	0	0	0	0	0	0	0	0	0.0012226	0	0	0
654.5	0	0	0	0	0	0	0	0	0	0	0	0	0	0	0.0015486	0	0	0
655	0	0	0	0	0	0	0	0	0	0	0	0	0	0	0.0019918	0	0	0
655.5	0	0	0	0	0	0	0	0	0	0	0	0	0	0	0.0024304	0	0	0
656	0	0	0	0	0	0	0	0	0	0	0	0	0	0	0.003005	0	0	0
656.5	0	0	0	0	0	0	0	0	0	0	0	0	0	0	0.0039774	0	0	0
657	0	0	0	0	0	0	0	0	0	0	0	0	0	0	0.0056332	0	0	0
657.5	0	0	0	0	0	0	0	0	0	0	0	0	0	0	0.008714	0	0	0
658	0	0	0	0	0	0	0	0	0	0	0	0	0	0	0.0156164	0	0	0
658.5	0	0	0	0	0	0	0	0	0	0	0	0	0	0	0.0321632	0	0	0
659	0	0	0	0	0	0	0	0	0	0	0	0	0	0	0.067323	0	0	0
659.5	0	0	0	0	0	0	0	0	0	0	0	0	0	0	0.1300344	0	0	0
660	0	0	0	0	0	0	0	0	0	0	0	0	0	0	0.2253674	0	0	0
660.5	0	0	0	0	0	0	0	0	0	0	0	0	0	0	0.349936	0	0	0
661	0	0	0	0	0	0	0	0	0	0	0	0	0	0	0.4972514	0	0	0
661.5	0	0	0	0	0	0	0	0	0	0	0	0	0	0	0.6550844	0	0	0
662	0	0	0	0	0	0	0	0	0	0	0	0	0	0	0.7971918	0	0	0
662.5	0	0	0	0	0	0	0	0	0	0	0	0	0	0	0.8989762	0	0	0
663	0	0	0	0	0	0	0	0	0	0	0	0	0	0	0.9560202	0	0	0
663.5	0	0	0	0	0	0	0	0	0	0	0	0	0	0	0.9787124	0	0	0
664	0	0	0	0	0	0	0	0	0	0	0	0	0	0	0.985124	0	0	0
664.5	0	0	0	0	0	0	0	0	0	0	0	0	0	0	0.9889676	0	0	0
665	0	0	0	0	0	0	0	0	0	0	0	0	0	0	0.9944136	0	0	0
665.5	0	0	0	0	0	0	0	0	0	0	0	0	0	0	0.9991168	0	0	0
666	0	0	0	0	0	0	0	0	0	0	0	0	0	0	0.9939304	0	0	0
666.5	0	0	0	0	0	0	0	0	0	0	0	0	0	0	0.9787514	0	0	0
667	0	0	0	0	0	0	0	0	0	0	0	0	0	0	0.9681736	0	0	0
667.5	0	0	0	0	0	0	0	0	0	0	0	0	0	0	0.9653286	0	0	0
668	0	0	0	0	0	0	0	0	0	0	0	0	0	0	0.9528818	0	0	0
668.5	0	0	0	0	0	0	0	0	0	0	0	0	0	0	0.9217472	0	0	0
669	0	0	0	0	0	0	0	0	0	0	0	0	0	0	0.880021	0	0	0
669.5	0	0	0	0	0	0	0	0	0	0	0	0	0	0	0.823701	0	0	0
670	0	0	0	0	0	0	0	0	0	0	0	0	0	0	0.7323988	0	0	0
670.5	0	0	0	0	0	0	0	0	0	0	0	0	0	0	0.6110094	0	0	0
671	0	0	0	0	0	0	0	0	0	0	0	0	0	0	0.4882368	0	0	0
671.5	0	0	0	0	0	0	0	0	0	0	0	0	0	0	0.3624452	0	0	0
672	0	0	0	0	0	0	0	0	0	0	0	0	0	0	0.2241672	0	0	0
672.5	0	0	0	0	0	0	0	0	0	0	0	0	0	0	0.111398	0	0	0
673	0	0	0	0	0	0	0	0	0	0	0	0	0	0	0.0482526	0	0	0
673.5	0	0	0	0	0	0	0	0	0	0	0	0	0	0	0.0196756	0	0	0
674	0	0	0	0	0	0	0	0	0	0	0	0	0	0	0.007517	0	0	0
674.5	0	0	0	0	0	0	0	0	0	0	0	0	0	0	0.0028366	0	0	0
675	0	0	0	0	0	0	0	0	0	0	0	0	0	0	0.0013296	0	0	0
675.5	0	0	0	0	0	0	0	0	0	0	0	0	0	0	0.0008476	0	0	0
676	0	0	0	0	0	0	0	0	0	0	0	0	0	0	0.0005372	0	0	0
676.5	0	0	0	0	0	0	0	0	0	0	0	0	0	0	0.0003026	0	0	0
677	0	0	0	0	0	0	0	0	0	0	0	0	0	0	5.18E-05	0	0	0
677.5	0	0	0	0	0	0	0	0	0	0	0	0	0	0	0	0	0	0
678	0	0	0	0	0	0	0	0	0	0	0	0	0	0	0	0	0	0
678.5	0	0	0	0	0	0	0	0	0	0	0	0	0	0	0	0	0	0
679	0	0	0	0	0	0	0	0	0	0	0	0	0	0	0	0	0	0
679.5	0	0	0	0	0	0	0	0	0	0	0	0	0	0	0	0	0	0
680	0	0	0	0	0	0	0	0	0	0	0	0	0	0	0	0	0	0
680.5	0	0	0	0	0	0	0	0	0	0	0	0	0	0	0	0	0	0
681	0	0	0	0	0	0	0	0	0	0	0	0	0	0	0	0	0	0
681.5	0	0	0	0	0	0	0	0	0	0	0	0	0	0	0	0	0	0
682	0	0	0	0	0	0	0	0	0	0	0	0	0	0	0	0	0	0
682.5	0	0	0	0	0	0	0	0	0	0	0	0	0	0	0	0	0	0
683	0	0	0	0	0	0	0	0	0	0	0	0	0	0	0	0	0	0
683.5	0	0	0	0	0	0	0	0	0	0	0	0	0	0	0	0	0	0
684	0	0	0	0	0	0	0	0	0	0	0	0	0	0	0	0	0	0
684.5	0	0	0	0	0	0	0	0	0	0	0	0	0	0	0	0	0	0
685	0	0	0	0	0	0	0	0	0	0	0	0	0	0	0	0	0	0
685.5	0	0	0	0	0	0	0	0	0	0	0	0	0	0	0	0	0	0
686	0	0	0	0	0	0	0	0	0	0	0	0	0	0	0	0	0	0
686.5	0	0	0	0	0	0	0	0	0	0	0	0	0	0	0	0	0	0
687	0	0	0	0	0	0	0	0	0	0	0	0	0	0	0	0	0	0
687.5	0	0	0	0	0	0	0	0	0	0	0	0	0	0	0	0	0	0
688	0	0	0	0	0	0	0	0	0	0	0	0	0	0	0	0	0	0
688.5	0	0	0	0	0	0	0	0	0	0	0	0	0	0	0	0	0	0
689	0	0	0	0	0	0	0	0	0	0	0	0	0	0	0	0	0	0
689.5	0	0	0	0	0	0	0	0	0	0	0	0	0	0	0	0	0	0
690	0	0	0	0	0	0	0	0	0	0	0	0	0	0	0	0	0	0
690.5	0	0	0	0	0	0	0	0	0	0	0	0	0	0	0	0	0	0
691	0	0	0	0	0	0	0	0	0	0	0	0	0	0	0	0	0	0
691.5	0	0	0	0	0	0	0	0	0	0	0	0	0	0	0	0	0	0
692	0	0	0	0	0	0	0	0	0	0	0	0	0	0	0	0	0	0
692.5	0	0	0	0	0	0	0	0	0	0	0	0	0	0	0	0	0	0
693	0	0	0	0	0	0	0	0	0	0	0	0	0	0	0	0	0	0
693.5	0	0	0	0	0	0	0	0	0	0	0	0	0	0	0	0	0	0
694	0	0	0	0	0	0	0	0	0	0	0	0	0	0	0	0	0	0
694.5	0	0	0	0	0	0	0	0	0	0	0	0	0	0	0	0	0	0
695	0	0	0	0	0	0	0	0	0	0	0	0	0	0	0	0	0	0
695.5	0	0	0	0	0	0	0	0	0	0	0	0	0	0	0	0	0	0
696	0	0	0	0	0	0	0	0	0	0	0	0	0	0	0	0	0	0
696.5	0	0	0	0	0	0	0	0	0	0	0	0	0	0	0	0	0	0
697	0	0	0	0	0	0	0	0	0	0	0	0	0	0	0	0	0	0
697.5	0	0	0	0	0	0	0	0	0	0	0	0	0	0	0	0	0	0
698	0	0	0	0	0	0	0	0	0	0	0	0	0	0	0	0	0	0
698.5	0	0	0	0	0	0	0	0	0	0	0	0	0	0	0	0	0	0
699	0	0	0	0	0	0	0	0	0	0	0	0	0	0	0	0	0	0
699.5	0	0	0	0	0	0	0	0	0	0	0	0	0	0	0	0	0	0
700	0	0	0	0	0	0	0	0	0	0	0	0	0	0	0	0	0	0
700.5	0	0	0	0	0	0	0	0	0	0	0	0	0	0	0	0	0	0
701	0	0	0	0	0	0	0	0	0	0	0	0	0	0	0	0	0	0
701.5	0	0	0	0	0	0	0	0	0	0	0	0	0	0	0	0	0	0
702	0	0	0	0	0	0	0	0	0	0	0	0	0	0	0	0	0	0
702.5	0	0	0	0	0	0	0	0	0	0	0	0	0	0	0	0	0	0
703	0	0	0	0	0	0	0	0	0	0	0	0	0	0	0	0	0	0
703.5	0	0	0	0	0	0	0	0	0	0	0	0	0	0	0	0	0	0
704	0	0	0	0	0	0	0	0	0	0	0	0	0	0	0	0	0	0
704.5	0	0	0	0	0	0	0	0	0	0	0	0	0	0	0	0	0	0
705	0	0	0	0	0	0	0	0	0	0	0	0	0	0	0	0	0	0
705.5	0	0	0	0	0	0	0	0	0	0	0	0	0	0	0	0	0	0
706	0	0	0	0	0	0	0	0	0	0	0	0	0	0	0	0	0	0
706.5	0	0	0	0	0	0	0	0	0	0	0	0	0	0	0	0	0	0
707	0	0	0	0	0	0	0	0	0	0	0	0	0	0	0	0	0	0
707.5	0	0	0	0	0	0	0	0	0	0	0	0	0	0	0	0	0	0
708	0	0	0	0	0	0	0	0	0	0	0	0	0	0	0	0	0	0
708.5	0	0	0	0	0	0	0	0	0	0	0	0	0	0	0	0	0	0
709	0	0	0	0	0	0	0	0	0	0	0	0	0	0	0	0	0	0
709.5	0	0	0	0	0	0	0	0	0	0	0	0	0	0	0	0	0	0
710	0	0	0	0	0	0	0	0	0	0	0	0	0	0	0	0	0	0
710.5	0	0	0	0	0	0	0	0	0	0	0	0	0	0	0	0	0	0
711	0	0	0	0	0	0	0	0	0	0	0	0	0	0	0	0	0	0
711.5	0	0	0	0	0	0	0	0	0	0	0	0	0	0	0	0	0	0
712	0	0	0	0	0	0	0	0	0	0	0	0	0	0	0	0	0	0
712.5	0	0	0	0	0	0	0	0	0	0	0	0	0	0	0	0	0	0
713	0	0	0	0	0	0	0	0	0	0	0	0	0	0	0	0	0	0
713.5	0	0	0	0	0	0	0	0	0	0	0	0	0	0	0	0	0	0
714	0	0	0	0	0	0	0	0	0	0	0	0	0	0	0	0	0	0
714.5	0	0	0	0	0	0	0	0	0	0	0	0	0	0	0	0	0	0
715	0	0	0	0	0	0	0	0	0	0	0	0	0	0	0	0	0	0
715.5	0	0	0	0	0	0	0	0	0	0	0	0	0	0	0	0	0	0
716	0	0	0	0	0	0	0	0	0	0	0	0	0	0	0	0	0	0
716.5	0	0	0	0	0	0	0	0	0	0	0	0	0	0	0	0	0	0
717	0	0	0	0	0	0	0	0	0	0	0	0	0	0	0	0	0	0
717.5	0	0	0	0	0	0	0	0	0	0	0	0	0	0	0	0	0	0
718	0	0	0	0	0	0	0	0	0	0	0	0	0	0	0	0	0	0
718.5	0	0	0	0	0	0	0	0	0	0	0	0	0	0	0	0	0	0
719	0	0	0	0	0	0	0	0	0	0	0	0	0	0	0	0	0	0
719.5	0	0	0	0	0	0	0	0	0	0	0	0	0	0	0	0	0	0
720	0	0	0	0	0	0	0	0	0	0	0	0	0	0	0	0	0	0
720.5	0	0	0	0	0	0	0	0	0	0	0	0	0	0	0	0	0	0
721	0	0	0	0	0	0	0	0	0	0	0	0	0	0	0	0	0	0
721.5	0	0	0	0	0	0	0	0	0	0	0	0	0	0	0	0	0	0
722	0	0	0	0	0	0	0	0	0	0	0	0	0	0	0	0	0	0
722.5	0	0	0	0	0	0	0	0	0	0	0	0	0	0	0	0	0	0
723	0	0	0	0	0	0	0	0	0	0	0	0	0	0	0	0	0	0
723.5	0	0	0	0	0	0	0	0	0	0	0	0	0	0	0	0	0	0
724	0	0	0	0	0	0	0	0	0	0	0	0	0	0	0	0	0	0
724.5	0	0	0	0	0	0	0	0	0	0	0	0	0	0	0	0	0	0
725	0	0	0	0	0	0	0	0	0	0	0	0	0	0	0	0	0	0
725.5	0	0	0	0	0	0	0	0	0	0	0	0	0	0	0	0	0	0
726	0	0	0	0	0	0	0	0	0	0	0	0	0	0	0	0	0	0
726.5	0	0	0	0	0	0	0	0	0	0	0	0	0	0	0	0	0	0
727	0	0	0	0	0	0	0	0	0	0	0	0	0	0	0	0	0	0
727.5	0	0	0	0	0	0	0	0	0	0	0	0	0	0	0	0	0	0
728	0	0	0	0	0	0	0	0	0	0	0	0	0	0	0	0	0	0
728.5	0	0	0	0	0	0	0	0	0	0	0	0	0	0	0	0	0	0
729	0	0	0	0	0	0	0	0	0	0	0	0	0	0	0	0	0	0
729.5	0	0	0	0	0	0	0	0	0	0	0	0	0	0	0	0	0	0
730	0	0	0	0	0	0	0	0	0	0	0	0	0	0	0	0	0	0
730.5	0	0	0	0	0	0	0	0	0	0	0	0	0	0	0	0	0	0
731	0	0	0	0	0	0	0	0	0	0	0	0	0	0	0	0	0	0
731.5	0	0	0	0	0	0	0	0	0	0	0	0	0	0	0	0	0	0
732	0	0	0	0	0	0	0	0	0	0	0	0	0	0	0	0	0	0
732.5	0	0	0	0	0	0	0	0	0	0	0	0	0	0	0	0	0	0
733	0	0	0	0	0	0	0	0	0	0	0	0	0	0	0	0	0	0
733.5	0	0	0	0	0	0	0	0	0	0	0	0	0	0	0	0	0	0
734	0	0	0	0	0	0	0	0	0	0	0	0	0	0	0	0	0	0
734.5	0	0	0	0	0	0	0	0	0	0	0	0	0	0	0	0	0	0
735	0	0	0	0	0	0	0	0	0	0	0	0	0	0	0	0	0	0
735.5	0	0	0	0	0	0	0	0	0	0	0	0	0	0	0	0	0	0
736	0	0	0	0	0	0	0	0	0	0	0	0	0	0	0	0	0	0
736.5	0	0	0	0	0	0	0	0	0	0	0	0	0	0	0	0	0	0
737	0	0	0	0	0	0	0	0	0	0	0	0	0	0	0	0	0	0
737.5	0	0	0	0	0	0	0	0	0	0	0	0	0	0	0	0	0	0
738	0	0	0	0	0	0	0	0	0	0	0	0	0	0	0	0	0	0
738.5	0	0	0	0	0	0	0	0	0	0	0	0	0	0	0	0	0	0
739	0	0	0	0	0	0	0	0	0	0	0	0	0	0	0	0	0	0
739.5	0	0	0	0	0	0	0	0	0	0	0	0	0	0	0	0	0	0
740	0	0	0	0	0	0	0	0	0	0	0	0	0	0	0	0	0	0
740.5	0	0	0	0	0	0	0	0	0	0	0	0	0	0	0	0	0	0
741	0	0	0	0	0	0	0	0	0	0	0	0	0	0	0	0	0	0
741.5	0	0	0	0	0	0	0	0	0	0	0	0	0	0	0	0	0	0
742	0	0	0	0	0	0	0	0	0	0	0	0	0	0	0	0	0	0
742.5	0	0	0	0	0	0	0	0	0	0	0	0	0	0	0	0	0	0
743	0	0	0	0	0	0	0	0	0	0	0	0	0	0	0	0	0	0
743.5	0	0	0	0	0	0	0	0	0	0	0	0	0	0	0	0	0	0
744	0	0	0	0	0	0	0	0	0	0	0	0	0	0	0	0	0	0
744.5	0	0	0	0	0	0	0	0	0	0	0	0	0	0	0	0	0	0
745	0	0	0	0	0	0	0	0	0	0	0	0	0	0	0	0	0	0
745.5	0	0	0	0	0	0	0	0	0	0	0	0	0	0	0	0	0	0
746	0	0	0	0	0	0	0	0	0	0	0	0	0	0	0	0	0	0
746.5	0	0	0	0	0	0	0	0	0	0	0	0	0	0	0	0	0	0
747	0	0	0	0	0	0	0	0	0	0	0	0	0	0	0	0	0	0
747.5	0	0	0	0	0	0	0	0	0	0	0	0	0	0	0	0	0	0
748	0	0	0	0	0	0	0	0	0	0	0	0	0	0	0	0	0	0
748.5	0	0	0	0	0	0	0	0	0	0	0	0	0	0	0	0	0	0
749	0	0	0	0	0	0	0	0	0	0	0	0	0	0	0	0	0	0
749.5	0	0	0	0	0	0	0	0	0	0	0	0	0	0	0	0	0	0
750	0	0	0	0	0	0	0	0	0	0	0	0	0	0	0	0	0	0
750.5	0	0	0	0	0	0	0	0	0	0	0	0	0	0	0	0	0	0
751	0	0	0	0	0	0	0	0	0	0	0	0	0	0	0	0	0	0
751.5	0	0	0	0	0	0	0	0	0	0	0	0	0	0	0	0	0	0
752	0	0	0	0	0	0	0	0	0	0	0	0	0	0	0	0	0	0
752.5	0	0	0	0	0	0	0	0	0	0	0	0	0	0	0	0	0	0
753	0	0	0	0	0	0	0	0	0	0	0	0	0	0	0	0	0	0
753.5	0	0	0	0	0	0	0	0	0	0	0	0	0	0	0	0	0	0
754	0	0	0	0	0	0	0	0	0	0	0	0	0	0	0	0	0	0
754.5	0	0	0	0	0	0	0	0	0	0	0	0	0	0	0	0	0	0
755	0	0	0	0	0	0	0	0	0	0	0	0	0	0	0	0	0	0
755.5	0	0	0	0	0	0	0	0	0	0	0	0	0	0	0	0	0	0
756	0	0	0	0	0	0	0	0	0	0	0	0	0	0	0	0	0	0
756.5	0	0	0	0	0	0	0	0	0	0	0	0	0	0	0	0	0	0
757	0	0	0	0	0	0	0	0	0	0	0	0	0	0	0	0	0	0
757.5	0	0	0	0	0	0	0	0	0	0	0	0	0	0	0	0	0	0
758	0	0	0	0	0	0	0	0	0	0	0	0	0	0	0	0	0	0
758.5	0	0	0	0	0	0	0	0	0	0	0	0	0	0	0	0	0	0
759	0	0	0	0	0	0	0	0	0	0	0	0	0	0	0	0	0	0
759.5	0	0	0	0	0	0	0	0	0	0	0	0	0	0	0	0	0	0
760	0	0	0	0	0	0	0	0	0	0	0	0	0	0	0	0	0	0
760.5	0	0	0	0	0	0	0	0	0	0	0	0	0	0	0	0	0	0
761	0	0	0	0	0	0	0	0	0	0	0	0	0	0	0	0	0	0
761.5	0	0	0	0	0	0	0	0	0	0	0	0	0	0	0	0	0	0
762	0	0	0	0	0	0	0	0	0	0	0	0	0	0	0	0	0	0
762.5	0	0	0	0	0	0	0	0	0	0	0	0	0	0	0	0	0	0
763	0	0	0	0	0	0	0	0	0	0	0	0	0	0	0	0	0	0
763.5	0	0	0	0	0	0	0	0	0	0	0	0	0	0	0	0	0	0
764	0	0	0	0	0	0	0	0	0	0	0	0	0	0	0	0	0	0
764.5	0	0	0	0	0	0	0	0	0	0	0	0	0	0	0	0	0	0
765	0	0	0	0	0	0	0	0	0	0	0	0	0	0	0	0	0	0
765.5	0	0	0	0	0	0	0	0	0	0	0	0	0	0	0	0	0	0
766	0	0	0	0	0	0	0	0	0	0	0	0	0	0	0	0	0	0
766.5	0	0	0	0	0	0	0	0	0	0	0	0	0	0	0	0	0	0
767	0	0	0	0	0	0	0	0	0	0	0	0	0	0	0	0	0	0
767.5	0	0	0	0	0	0	0	0	0	0	0	0	0	0	0	0	0	0
768	0	0	0	0	0	0	0	0	0	0	0	0	0	0	0	0	0	0
768.5	0	0	0	0	0	0	0	0	0	0	0	0	0	0	0	0	0	0
769	0	0	0	0	0	0	0	0	0	0	0	0	0	0	0	0	0	0
769.5	0	0	0	0	0	0	0	0	0	0	0	0	0	0	0	0	0	0
770	0	0	0	0	0	0	0	0	0	0	0	0	0	0	0	0	0	0
770.5	0	0	0	0	0	0	0	0	0	0	0	0	0	0	0	0	0	0
771	0	0	0	0	0	0	0	0	0	0	0	0	0	0	0	0	0	0
771.5	0	0	0	0	0	0	0	0	0	0	0	0	0	0	0	0	0	0
772	0	0	0	0	0	0	0	0	0	0	0	0	0	0	0	0	0	0
772.5	0	0	0	0	0	0	0	0	0	0	0	0	0	0	0	0	0	0
773	0	0	0	0	0	0	0	0	0	0	0	0	0	0	0	0	0	0
773.5	0	0	0	0	0	0	0	0	0	0	0	0	0	0	0	0	0	0
774	0	0	0	0	0	0	0	0	0	0	0	0	0	0	0	0	0	0
774.5	0	0	0	0	0	0	0	0	0	0	0	0	0	0	0	0	0	0
775	0	0	0	0	0	0	0	0	0	0	0	0	0	0	0	0	0	0
775.5	0	0	0	0	0	0	0	0	0	0	0	0	0	0	0	0	0	0
776	0	0	0	0	0	0	0	0	0	0	0	0	0	0	0	0	0	0
776.5	0	0	0	0	0	0	0	0	0	0	0	0	0	0	0	0	0	0
777	0	0	0	0	0	0	0	0	0	0	0	0	0	0	0	0	0	0
777.5	0	0	0	0	0	0	0	0	0	0	0	0	0	0	0	0	0	0
778	0	0	0	0	0	0	0	0	0	0	0	0	0	0	0	0	0	0
778.5	0	0	0	0	0	0	0	0	0	0	0	0	0	0	0	0	0	0
779	0	0	0	0	0	0	0	0	0	0	0	0	0	0	0	0	0	0
779.5	0	0	0	0	0	0	0	0	0	0	0	0	0	0	0	0	0	0
780	0	0	0	0	0	0	0	0	0	0	0	0	0	0	0	0	0	0
780.5	0	0	0	0	0	0	0	0	0	0	0	0	0	0	0	0	0	0
781	0	0	0	0	0	0	0	0	0	0	0	0	0	0	0	0	0	0
781.5	0	0	0	0	0	0	0	0	0	0	0	0	0	0	0	0	0	0
782	0	0	0	0	0	0	0	0	0	0	0	0	0	0	0	0	0	0
782.5	0	0	0	0	0	0	0	0	0	0	0	0	0	0	0	0	0	0
783	0	0	0	0	0	0	0	0	0	0	0	0	0	0	0	0	0	0
783.5	0	0	0	0	0	0	0	0	0	0	0	0	0	0	0	0	0	0
784	0	0	0	0	0	0	0	0	0	0	0	0	0	0	0	0	0	0
784.5	0	0	0	0	0	0	0	0	0	0	0	0	0	0	0	0	0	0
785	0	0	0	0	0	0	0	0	0	0	0	0	0	0	0	0	0	0
785.5	0	0	0	0	0	0	0	0	0	0	0	0	0	0	0	0	0	0
786	0	0	0	0	0	0	0	0	0	0	0	0	0	0	0	0	0	0
786.5	0	0	0	0	0	0	0	0	0	0	0	0	0	0	0	0	0	0
787	0	0	0	0	0	0	0	0	0	0	0	0	0	0	0	0	0	0
787.5	0	0	0	0	0	0	0	0	0	0	0	0	0	0	0	0	0	0
788	0	0	0	0	0	0	0	0	0	0	0	0	0	0	0	0	0	0
788.5	0	0	0	0	0	0	0	0	0	0	0	0	0	0	0	0	0	0
789	0	0	0	0	0	0	0	0	0	0	0	0	0	0	0	0	0	0
789.5	0	0	0	0	0	0	0	0	0	0	0	0	0	0	0	0	0	0
790	0	0	0	0	0	0	0	0	0	0	0	0	0	0	0	0	0	0
790.5	0	0	0	0	0	0	0	0	0	0	0	0	0	0	0	0	0	0
791	0	0	0	0	0	0	0	0	0	0	0	0	0	0	0	0	0	0
791.5	0	0	0	0	0	0	0	0	0	0	0	0	0	0	0	0	0	0
792	0	0	0	0	0	0	0	0	0	0	0	0	0	0	0	0	0	0
792.5	0	0	0	0	0	0	0	0	0	0	0	0	0	0	0	0	0	0
793	0	0	0	0	0	0	0	0	0	0	0	0	0	0	0	0	0	0
793.5	0	0	0	0	0	0	0	0	0	0	0	0	0	0	0	0	0	0
794	0	0	0	0	0	0	0	0	0	0	0	0	0	0	0	0	0	0
794.5	0	0	0	0	0	0	0	0	0	0	0	0	0	0	0	0	0	0
795	0	0	0	0	0	0	0	0	0	0	0	0	0	0	0	0	0	0
795.5	0	0	0	0	0	0	0	0	0	0	0	0	0	0	0	0	0	0
796	0	0	0	0	0	0	0	0	0	0	0	0	0	0	0	0	0	0
796.5	0	0	0	0	0	0	0	0	0	0	0	0	0	0	0	0	0	0
797	0	0	0	0	0	0	0	0	0	0	0	0	0	0	0	0	0	0
797.5	0	0	0	0	0	0	0	0	0	0	0	0	0	0	0	0	0	0
798	0	0	0	0	0	0	0	0	0	0	0	0	0	0	0	0	0	0
798.5	0	0	0	0	0	0	0	0	0	0	0	0	0	0	0	0	0	0
799	0	0	0	0	0	0	0	0	0	0	0	0	0	0	0	0	0	0
799.5	0	0	0	0	0	0	0	0	0	0	0	0	0	0	0	0	0	0
800	0	0	0	0	0	0	0	0	0	0	0	0	0	0	0	0	0	0
800.5	0	0	0	0	0	0	0	0	0	0	0	0	0	0	0	0	0	0
801	0	0	0	0	0	0	0	0	0	0	0	0	0	0	0	0	0	0
801.5	0	0	0	0	0	0	0	0	0	0	0	0	0	0	0	0	0	0
802	0	0	0	0	0	0	0	0	0	0	0	0	0	0	0	0	0	0
802.5	0	0	0	0	0	0	0	0	0	0	0	0	0	0	0	0	0	0
803	0	0	0	0	0	0	0	0	0	0	0	0	0	0	0	0	0	0
803.5	0	0	0	0	0	0	0	0	0	0	0	0	0	0	0	0	0	0
804	0	0	0	0	0	0	0	0	0	0	0	0	0	0	0	0	0	0
804.5	0	0	0	0	0	0	0	0	0	0	0	0	0	0	0	0	0	0
805	0	0	0	0	0	0	0	0	0	0	0	0	0	0	0	0	0	0
805.5	0	0	0	0	0	0	0	0	0	0	0	0	0	0	0	0	0	0
806	0	0	0	0	0	0	0	0	0	0	0	0	0	0	0	0	0	0
806.5	0	0	0	0	0	0	0	0	0	0	0	0	0	0	0	0	0	0
807	0	0	0	0	0	0	0	0	0	0	0	0	0	0	0	0	0	0
807.5	0	0	0	0	0	0	0	0	0	0	0	0	0	0	0	0	0	0
808	0	0	0	0	0	0	0	0	0	0	0	0	0	0	0	0	0	0
808.5	0	0	0	0	0	0	0	0	0	0	0	0	0	0	0	0	0	0
809	0	0	0	0	0	0	0	0	0	0	0	0	0	0	0	0	0	0
809.5	0	0	0	0	0	0	0	0	0	0	0	0	0	0	0	0	0	0
810	0	0	0	0	0	0	0	0	0	0	0	0	0	0	0	0	0	0
810.5	0	0	0	0	0	0	0	0	0	0	0	0	0	0	0	0	0	0
811	0	0	0	0	0	0	0	0	0	0	0	0	0	0	0	0	0	0
811.5	0	0	0	0	0	0	0	0	0	0	0	0	0	0	0	0	0	0
812	0	0	0	0	0	0	0	0	0	0	0	0	0	0	0	0	0	0
812.5	0	0	0	0	0	0	0	0	0	0	0	0	0	0	0	0	0	0
813	0	0	0	0	0	0	0	0	0	0	0	0	0	0	0	0	0	0
813.5	0	0	0	0	0	0	0	0	0	0	0	0	0	0	0	0	0	0
814	0	0	0	0	0	0	0	0	0	0	0	0	0	0	0	0	0	0
814.5	0	0	0	0	0	0	0	0	0	0	0	0	0	0	0	0	0	0
815	0	0	0	0	0	0	0	0	0	0	0	0	0	0	0	0	0	0
815.5	0	0	0	0	0	0	0	0	0	0	0	0	0	0	0	0	0	0
816	0	0	0	0	0	0	0	0	0	0	0	0	0	0	0	0	0	0
816.5	0	0	0	0	0	0	0	0	0	0	0	0	0	0	0	0	0	0
817	0	0	0	0	0	0	0	0	0	0	0	0	0	0	0	0	0	0
817.5	0	0	0	0	0	0	0	0	0	0	0	0	0	0	0	0	0	0
818	0	0	0	0	0	0	0	0	0	0	0	0	0	0	0	0	0	0
818.5	0	0	0	0	0	0	0	0	0	0	0	0	0	0	0	0	0	0
819	0	0	0	0	0	0	0	0	0	0	0	0	0	0	0	0	0	0
819.5	0	0	0	0	0	0	0	0	0	0	0	0	0	0	0	0	0	0
820	0	0	0	0	0	0	0	0	0	0	0	0	0	0	0	0	0	0
820.5	0	0	0	0	0	0	0	0	0	0	0	0	0	0	0	0	0	0
821	0	0	0	0	0	0	0	0	0	0	0	0	0	0	0	0	0	0
821.5	0	0	0	0	0	0	0	0	0	0	0	0	0	0	0	0	0	0
822	0	0	0	0	0	0	0	0	0	0	0	0	0	0	0	0	0	0
822.5	0	0	0	0	0	0	0	0	0	0	0	0	0	0	0	0	0	0
823	0	0	0	0	0	0	0	0	0	0	0	0	0	0	0	0	0	0
823.5	0	0	0	0	0	0	0	0	0	0	0	0	0	0	0	0	0	0
824	0	0	0	0	0	0	0	0	0	0	0	0	0	0	0	0	0	0
824.5	0	0	0	0	0	0	0	0	0	0	0	0	0	0	0	0	0	0
825	0	0	0	0	0	0	0	0	0	0	0	0	0	0	0	0	0	0
825.5	0	0	0	0	0	0	0	0	0	0	0	0	0	0	0	0	0	0
826	0	0	0	0	0	0	0	0	0	0	0	0	0	0	0	0	0	0
826.5	0	0	0	0	0	0	0	0	0	0	0	0	0	0	0	0	0	0
827	0	0	0	0	0	0	0	0	0	0	0	0	0	0	0	0	0	0
827.5	0	0	0	0	0	0	0	0	0	0	0	0	0	0	0	0	0	0
828	0	0	0	0	0	0	0	0	0	0	0	0	0	0	0	0	0	0
828.5	0	0	0	0	0	0	0	0	0	0	0	0	0	0	0	0	0	0
829	0	0	0	0	0	0	0	0	0	0	0	0	0	0	0	0	0	0
829.5	0	0	0	0	0	0	0	0	0	0	0	0	0	0	0	0	0	0
830	0	0	0	0	0	0	0	0	0	0	0	0	0	0	0	0	0	0
830.5	0	0	0	0	0	0	0	0	0	0	0	0	0	0	0	0	0	0
831	0	0	0	0	0	0	0	0	0	0	0	0	0	0	0	0	0	0
831.5	0	0	0	0	0	0	0	0	0	0	0	0	0	0	0	0	0	0
832	0	0	0	0	0	0	0	0	0	0	0	0	0	0	0	0	0	0
832.5	0	0	0	0	0	0	0	0	0	0	0	0	0	0	0	0	0	0
833	0	0	0	0	0	0	0	0	0	0	0	0	0	0	0	0	0	0
833.5	0	0	0	0	0	0	0	0	0	0	0	0	0	0	0	0	0	0
834	0	0	0	0	0	0	0	0	0	0	0	0	0	0	0	0	0	0
834.5	0	0	0	0	0	0	0	0	0	0	0	0	0	0	0	0	0	0
835	0	0	0	0	0	0	0	0	0	0	0	0	0	0	0	9.63E-05	0	0
835.5	0	0	0	0	0	0	0	0	0	0	0	0	0	0	0	0.00010615	0	0
836	0	0	0	0	0	0	0	0	0	0	0	0	0	0	0	0.000116	0	0
836.5	0	0	0	0	0	0	0	0	0	0	0	0	0	0	0	0.000131	0	0
837	0	0	0	0	0	0	0	0	0	0	0	0	0	0	0	0.000146	0	0
837.5	0	0	0	0	0	0	0	0	0	0	0	0	0	0	0	0.000173	0	0
838	0	0	0	0	0	0	0	0	0	0	0	0	0	0	0	0.0002	0	0
838.5	0	0	0	0	0	0	0	0	0	0	0	0	0	0	0	0.000237	0	0
839	0	0	0	0	0	0	0	0	0	0	0	0	0	0	0	0.000274	0	0
839.5	0	0	0	0	0	0	0	0	0	0	0	0	0	0	0	0.0003075	0	0
840	0	0	0	0	0	0	0	0	0	0	0	0	0	0	0	0.000341	0	0
840.5	0	0	0	0	0	0	0	0	0	0	0	0	0	0	0	0.0003615	0	0
841	0	0	0	0	0	0	0	0	0	0	0	0	0	0	0	0.000382	0	0
841.5	0	0	0	0	0	0	0	0	0	0	0	0	0	0	0	0.0003925	0	0
842	0	0	0	0	0	0	0	0	0	0	0	0	0	0	0	0.000403	0	0
842.5	0	0	0	0	0	0	0	0	0	0	0	0	0	0	0	0.0004125	0	0
843	0	0	0	0	0	0	0	0	0	0	0	0	0	0	0	0.000422	0	0
843.5	0	0	0	0	0	0	0	0	0	0	0	0	0	0	0	0.0004395	0	0
844	0	0	0	0	0	0	0	0	0	0	0	0	0	0	0	0.000457	0	0
844.5	0	0	0	0	0	0	0	0	0	0	0	0	0	0	0	0.0004595	0	0
845	0	0	0	0	0	0	0	0	0	0	0	0	0	0	0	0.000462	0	0
845.5	0	0	0	0	0	0	0	0	0	0	0	0	0	0	0	0.000451	0	0
846	0	0	0	0	0	0	0	0	0	0	0	0	0	0	0	0.00044	0	0
846.5	0	0	0	0	0	0	0	0	0	0	0	0	0	0	0	0.0004145	0	0
847	0	0	0	0	0	0	0	0	0	0	0	0	0	0	0	0.000389	0	0
847.5	0	0	0	0	0	0	0	0	0	0	0	0	0	0	0	0.000378	0	0
848	0	0	0	0	0	0	0	0	0	0	0	0	0	0	0	0.000367	0	0
848.5	0	0	0	0	0	0	0	0	0	0	0	0	0	0	0	0.00036	0	0
849	0	0	0	0	0	0	0	0	0	0	0	0	0	0	0	0.000353	0	0
849.5	0	0	0	0	0	0	0	0	0	0	0	0	0	0	0	0.000351	0	0
850	0	0	0	0	0	0	0	0	0	0	0	0	0	0	0	0.000349	0	0
850.5	0	0	0	0	0	0	0	0	0	0	0	0	0	0	0	0.00036	0	0
851	0	0	0	0	0	0	0	0	0	0	0	0	0	0	0	0.000371	0	0
851.5	0	0	0	0	0	0	0	0	0	0	0	0	0	0	0	0.000383	0	0
852	0	0	0	0	0	0	0	0	0	0	0	0	0	0	0	0.000395	0	0
852.5	0	0	0	0	0	0	0	0	0	0	0	0	0	0	0	0.000411	0	0
853	0	0	0	0	0	0	0	0	0	0	0	0	0	0	0	0.000427	0	0
853.5	0	0	0	0	0	0	0	0	0	0	0	0	0	0	0	0.000464	0	0
854	0	0	0	0	0	0	0	0	0	0	0	0	0	0	0	0.000501	0	0
854.5	0	0	0	0	0	0	0	0	0	0	0	0	0	0	0	0.0005295	0	0
855	0	0	0	0	0	0	0	0	0	0	0	0	0	0	0	0.000558	0	0
855.5	0	0	0	0	0	0	0	0	0	0	0	0	0	0	0	0.000608	0	0
856	0	0	0	0	0	0	0	0	0	0	0	0	0	0	0	0.000658	0	0
856.5	0	0	0	0	0	0	0	0	0	0	0	0	0	0	0	0.0007105	0	0
857	0	0	0	0	0	0	0	0	0	0	0	0	0	0	0	0.000763	0	0
857.5	0	0	0	0	0	0	0	0	0	0	0	0	0	0	0	0.0008345	0	0
858	0	0	0	0	0	0	0	0	0	0	0	0	0	0	0	0.000906	0	0
858.5	0	0	0	0	0	0	0	0	0	0	0	0	0	0	0	0.001008	0	0
859	0	0	0	0	0	0	0	0	0	0	0	0	0	0	0	0.00111	0	0
859.5	0	0	0	0	0	0	0	0	0	0	0	0	0	0	0	0.00121	0	0
860	0	0	0	0	0	0	0	0	0	0	0	0	0	0	0	0.00131	0	0
860.5	0	0	0	0	0	0	0	0	0	0	0	0	0	0	0	0.00146	0	0
861	0	0	0	0	0	0	0	0	0	0	0	0	0	0	0	0.00161	0	0
861.5	0	0	0	0	0	0	0	0	0	0	0	0	0	0	0	0.001905	0	0
862	0	0	0	0	0	0	0	0	0	0	0	0	0	0	0	0.0022	0	0
862.5	0	0	0	0	0	0	0	0	0	0	0	0	0	0	0	0.002745	0	0
863	0	0	0	0	0	0	0	0	0	0	0	0	0	0	0	0.00329	0	0
863.5	0	0	0	0	0	0	0	0	0	0	0	0	0	0	0	0.004285	0	0
864	0	0	0	0	0	0	0	0	0	0	0	0	0	0	0	0.00528	0	0
864.5	0	0	0	0	0	0	0	0	0	0	0	0	0	0	0	0.007275	0	0
865	0	0	0	0	0	0	0	0	0	0	0	0	0	0	0	0.00927	0	0
865.5	0	0	0	0	0	0	0	0	0	0	0	0	0	0	0	0.013785	0	0
866	0	0	0	0	0	0	0	0	0	0	0	0	0	0	0	0.0183	0	0
866.5	0	0	0	0	0	0	0	0	0	0	0	0	0	0	0	0.02915	0	0
867	0	0	0	0	0	0	0	0	0	0	0	0	0	0	0	0.04	0	0
867.5	0	0	0	0	0	0	0	0	0	0	0	0	0	0	0	0.06655	0	0
868	0	0	0	0	0	0	0	0	0	0	0	0	0	0	0	0.0931	0	0
868.5	0	0	0	0	0	0	0	0	0	0	0	0	0	0	0	0.14655	0	0
869	0	0	0	0	0	0	0	0	0	0	0	0	0	0	0	0.2	0	0
869.5	0	0	0	0	0	0	0	0	0	0	0	0	0	0	0	0.2895	0	0
870	0	0	0	0	0	0	0	0	0	0	0	0	0	0	0	0.379	0	0
870.5	0	0	0	0	0	0	0	0	0	0	0	0	0	0	0	0.49	0	0
871	0	0	0	0	0	0	0	0	0	0	0	0	0	0	0	0.601	0	0
871.5	0	0	0	0	0	0	0	0	0	0	0	0	0	0	0	0.705	0	0
872	0	0	0	0	0	0	0	0	0	0	0	0	0	0	0	0.809	0	0
872.5	0	0	0	0	0	0	0	0	0	0	0	0	0	0	0	0.8785	0	0
873	0	0	0	0	0	0	0	0	0	0	0	0	0	0	0	0.948	0	0
873.5	0	0	0	0	0	0	0	0	0	0	0	0	0	0	0	0.974	0	0
874	0	0	0	0	0	0	0	0	0	0	0	0	0	0	0	1	0	0
874.5	0	0	0	0	0	0	0	0	0	0	0	0	0	0	0	0.9975	0	0
875	0	0	0	0	0	0	0	0	0	0	0	0	0	0	0	0.995	0	0
875.5	0	0	0	0	0	0	0	0	0	0	0	0	0	0	0	0.9805	0	0
876	0	0	0	0	0	0	0	0	0	0	0	0	0	0	0	0.966	0	0
876.5	0	0	0	0	0	0	0	0	0	0	0	0	0	0	0	0.95	0	0
877	0	0	0	0	0	0	0	0	0	0	0	0	0	0	0	0.934	0	0
877.5	0	0	0	0	0	0	0	0	0	0	0	0	0	0	0	0.924	0	0
878	0	0	0	0	0	0	0	0	0	0	0	0	0	0	0	0.914	0	0
878.5	0	0	0	0	0	0	0	0	0	0	0	0	0	0	0	0.9015	0	0
879	0	0	0	0	0	0	0	0	0	0	0	0	0	0	0	0.889	0	0
879.5	0	0	0	0	0	0	0	0	0	0	0	0	0	0	0	0.8635	0	0
880	0	0	0	0	0	0	0	0	0	0	0	0	0	0	0	0.838	0	0
880.5	0	0	0	0	0	0	0	0	0	0	0	0	0	0	0	0.79	0	0
881	0	0	0	0	0	0	0	0	0	0	0	0	0	0	0	0.742	0	0
881.5	0	0	0	0	0	0	0	0	0	0	0	0	0	0	0	0.667	0	0
882	0	0	0	0	0	0	0	0	0	0	0	0	0	0	0	0.592	0	0
882.5	0	0	0	0	0	0	0	0	0	0	0	0	0	0	0	0.501	0	0
883	0	0	0	0	0	0	0	0	0	0	0	0	0	0	0	0.41	0	0
883.5	0	0	0	0	0	0	0	0	0	0	0	0	0	0	0	0.3235	0	0
884	0	0	0	0	0	0	0	0	0	0	0	0	0	0	0	0.237	0	0
884.5	0	0	0	0	0	0	0	0	0	0	0	0	0	0	0	0.1725	0	0
885	0	0	0	0	0	0	0	0	0	0	0	0	0	0	0	0.108	0	0
885.5	0	0	0	0	0	0	0	0	0	0	0	0	0	0	0	0.0689	0	0
886	0	0	0	0	0	0	0	0	0	0	0	0	0	0	0	0.0298	0	0
886.5	0	0	0	0	0	0	0	0	0	0	0	0	0	0	0	0.01786	0	0
887	0	0	0	0	0	0	0	0	0	0	0	0	0	0	0	0.00592	0	0
887.5	0	0	0	0	0	0	0	0	0	0	0	0	0	0	0	0.003725	0	0
888	0	0	0	0	0	0	0	0	0	0	0	0	0	0	0	0.00153	0	0
888.5	0	0	0	0	0	0	0	0	0	0	0	0	0	0	0	0.001021	0	0
889	0	0	0	0	0	0	0	0	0	0	0	0	0	0	0	0.000512	0	0
889.5	0	0	0	0	0	0	0	0	0	0	0	0	0	0	0	0.0003585	0	0
890	0	0	0	0	0	0	0	0	0	0	0	0	0	0	0	0.000205	0	0
890.5	0	0	0	0	0	0	0	0	0	0	0	0	0	0	0	0.00014345	0	0
891	0	0	0	0	0	0	0	0	0	0	0	0	0	0	0	8.19E-05	0	0
891.5	0	0	0	0	0	0	0	0	0	0	0	0	0	0	0	0	0	0
892	0	0	0	0	0	0	0	0	0	0	0	0	0	0	0	0	0	0
892.5	0	0	0	0	0	0	0	0	0	0	0	0	0	0	0	0	0	0
893	0	0	0	0	0	0	0	0	0	0	0	0	0	0	0	0	0	0
893.5	0	0	0	0	0	0	0	0	0	0	0	0	0	0	0	0	0	0
894	0	0	0	0	0	0	0	0	0	0	0	0	0	0	0	0	0	0
894.5	0	0	0	0	0	0	0	0	0	0	0	0	0	0	0	0	0	0
895	0	0	0	0	0	0	0	0	0	0	0	0	0	0	0	0	0	0
895.5	0	0	0	0	0	0	0	0	0	0	0	0	0	0	0	0	0	0
896	0	0	0	0	0	0	0	0	0	0	0	0	0	0	0	0	0	0
896.5	0	0	0	0	0	0	0	0	0	0	0	0	0	0	0	0	0	0
897	0	0	0	0	0	0	0	0	0	0	0	0	0	0	0	0	0	0
897.5	0	0	0	0	0	0	0	0	0	0	0	0	0	0	0	0	0	0
898	0	0	0	0	0	0	0	0	0	0	0	0	0	0	0	0	0	0
898.5	0	0	0	0	0	0	0	0	0	0	0	0	0	0	0	0	0	0
899	0	0	0	0	0	0	0	0	0	0	0	0	0	0	0	0	0	0
899.5	0	0	0	0	0	0	0	0	0	0	0	0	0	0	0	0	0	0
900	0	0	0	0	0	0	0	0	0	0	0	0	0	0	0	0	0	0
900.5	0	0	0	0	0	0	0	0	0	0	0	0	0	0	0	0	0	0
901	0	0	0	0	0	0	0	0	0	0	0	0	0	0	0	0	0	0
901.5	0	0	0	0	0	0	0	0	0	0	0	0	0	0	0	0	0	0
902	0	0	0	0	0	0	0	0	0	0	0	0	0	0	0	0	0	0
902.5	0	0	0	0	0	0	0	0	0	0	0	0	0	0	0	0	0	0
903	0	0	0	0	0	0	0	0	0	0	0	0	0	0	0	0	0	0
903.5	0	0	0	0	0	0	0	0	0	0	0	0	0	0	0	0	0	0
904	0	0	0	0	0	0	0	0	0	0	0	0	0	0	0	0	0	0
904.5	0	0	0	0	0	0	0	0	0	0	0	0	0	0	0	0	0	0
905	0	0	0	0	0	0	0	0	0	0	0	0	0	0	0	0	0	0
905.5	0	0	0	0	0	0	0	0	0	0	0	0	0	0	0	0	0	0
906	0	0	0	0	0	0	0	0	0	0	0	0	0	0	0	0	0	0
906.5	0	0	0	0	0	0	0	0	0	0	0	0	0	0	0	0	0	0
907	0	0	0	0	0	0	0	0	0	0	0	0	0	0	0	0	0	0
907.5	0	0	0	0	0	0	0	0	0	0	0	0	0	0	0	0	0	0
908	0	0	0	0	0	0	0	0	0	0	0	0	0	0	0	0	0	0
908.5	0	0	0	0	0	0	0	0	0	0	0	0	0	0	0	0	0	0
909	0	0	0	0	0	0	0	0	0	0	0	0	0	0	0	0	0	0
909.5	0	0	0	0	0	0	0	0	0	0	0	0	0	0	0	0	0	0
910	0	0	0	0	0	0	0	0	0	0	0	0	0	0	0	0	0	0
910.5	0	0	0	0	0	0	0	0	0	0	0	0	0	0	0	0	0	0
911	0	0	0	0	0	0	0	0	0	0	0	0	0	0	0	0	0	0
911.5	0	0	0	0	0	0	0	0	0	0	0	0	0	0	0	0	0	0
912	0	0	0	0	0	0	0	0	0	0	0	0	0	0	0	0	0	0
912.5	0	0	0	0	0	0	0	0	0	0	0	0	0	0	0	0	0	0
913	0	0	0	0	0	0	0	0	0	0	0	0	0	0	0	0	0	0
913.5	0	0	0	0	0	0	0	0	0	0	0	0	0	0	0	0	0	0
914	0	0	0	0	0	0	0	0	0	0	0	0	0	0	0	0	0	0
914.5	0	0	0	0	0	0	0	0	0	0	0	0	0	0	0	0	0	0
915	0	0	0	0	0	0	0	0	0	0	0	0	0	0	0	0	0.0009592	0
915.5	0	0	0	0	0	0	0	0	0	0	0	0	0	0	0	0	0.0012142	0
916	0	0	0	0	0	0	0	0	0	0	0	0	0	0	0	0	0.00123	0
916.5	0	0	0	0	0	0	0	0	0	0	0	0	0	0	0	0	0.0012698	0
917	0	0	0	0	0	0	0	0	0	0	0	0	0	0	0	0	0.0013798	0
917.5	0	0	0	0	0	0	0	0	0	0	0	0	0	0	0	0	0.0015002	0
918	0	0	0	0	0	0	0	0	0	0	0	0	0	0	0	0	0.0015264	0
918.5	0	0	0	0	0	0	0	0	0	0	0	0	0	0	0	0	0.001479	0
919	0	0	0	0	0	0	0	0	0	0	0	0	0	0	0	0	0.001439	0
919.5	0	0	0	0	0	0	0	0	0	0	0	0	0	0	0	0	0.0015056	0
920	0	0	0	0	0	0	0	0	0	0	0	0	0	0	0	0	0.001776	0
920.5	0	0	0	0	0	0	0	0	0	0	0	0	0	0	0	0	0.0021838	0
921	0	0	0	0	0	0	0	0	0	0	0	0	0	0	0	0	0.0025116	0
921.5	0	0	0	0	0	0	0	0	0	0	0	0	0	0	0	0	0.0026176	0
922	0	0	0	0	0	0	0	0	0	0	0	0	0	0	0	0	0.0025114	0
922.5	0	0	0	0	0	0	0	0	0	0	0	0	0	0	0	0	0.0024612	0
923	0	0	0	0	0	0	0	0	0	0	0	0	0	0	0	0	0.0027208	0
923.5	0	0	0	0	0	0	0	0	0	0	0	0	0	0	0	0	0.003175	0
924	0	0	0	0	0	0	0	0	0	0	0	0	0	0	0	0	0.0035504	0
924.5	0	0	0	0	0	0	0	0	0	0	0	0	0	0	0	0	0.003856	0
925	0	0	0	0	0	0	0	0	0	0	0	0	0	0	0	0	0.0042566	0
925.5	0	0	0	0	0	0	0	0	0	0	0	0	0	0	0	0	0.004894	0
926	0	0	0	0	0	0	0	0	0	0	0	0	0	0	0	0	0.0058688	0
926.5	0	0	0	0	0	0	0	0	0	0	0	0	0	0	0	0	0.0070116	0
927	0	0	0	0	0	0	0	0	0	0	0	0	0	0	0	0	0.0080146	0
927.5	0	0	0	0	0	0	0	0	0	0	0	0	0	0	0	0	0.0090518	0
928	0	0	0	0	0	0	0	0	0	0	0	0	0	0	0	0	0.010555	0
928.5	0	0	0	0	0	0	0	0	0	0	0	0	0	0	0	0	0.012738	0
929	0	0	0	0	0	0	0	0	0	0	0	0	0	0	0	0	0.015763	0
929.5	0	0	0	0	0	0	0	0	0	0	0	0	0	0	0	0	0.019939	0
930	0	0	0	0	0	0	0	0	0	0	0	0	0	0	0	0	0.025603	0
930.5	0	0	0	0	0	0	0	0	0	0	0	0	0	0	0	0	0.0325948	0
931	0	0	0	0	0	0	0	0	0	0	0	0	0	0	0	0	0.0406352	0
931.5	0	0	0	0	0	0	0	0	0	0	0	0	0	0	0	0	0.0516886	0
932	0	0	0	0	0	0	0	0	0	0	0	0	0	0	0	0	0.0699616	0
932.5	0	0	0	0	0	0	0	0	0	0	0	0	0	0	0	0	0.0989748	0
933	0	0	0	0	0	0	0	0	0	0	0	0	0	0	0	0	0.1403842	0
933.5	0	0	0	0	0	0	0	0	0	0	0	0	0	0	0	0	0.1897288	0
934	0	0	0	0	0	0	0	0	0	0	0	0	0	0	0	0	0.2378264	0
934.5	0	0	0	0	0	0	0	0	0	0	0	0	0	0	0	0	0.2904464	0
935	0	0	0	0	0	0	0	0	0	0	0	0	0	0	0	0	0.3632178	0
935.5	0	0	0	0	0	0	0	0	0	0	0	0	0	0	0	0	0.4578694	0
936	0	0	0	0	0	0	0	0	0	0	0	0	0	0	0	0	0.56289	0
936.5	0	0	0	0	0	0	0	0	0	0	0	0	0	0	0	0	0.6582708	0
937	0	0	0	0	0	0	0	0	0	0	0	0	0	0	0	0	0.7245898	0
937.5	0	0	0	0	0	0	0	0	0	0	0	0	0	0	0	0	0.7674328	0
938	0	0	0	0	0	0	0	0	0	0	0	0	0	0	0	0	0.8029696	0
938.5	0	0	0	0	0	0	0	0	0	0	0	0	0	0	0	0	0.841351	0
939	0	0	0	0	0	0	0	0	0	0	0	0	0	0	0	0	0.8865856	0
939.5	0	0	0	0	0	0	0	0	0	0	0	0	0	0	0	0	0.9295732	0
940	0	0	0	0	0	0	0	0	0	0	0	0	0	0	0	0	0.9604808	0
940.5	0	0	0	0	0	0	0	0	0	0	0	0	0	0	0	0	0.9814098	0
941	0	0	0	0	0	0	0	0	0	0	0	0	0	0	0	0	0.9955528	0
941.5	0	0	0	0	0	0	0	0	0	0	0	0	0	0	0	0	0.99766	0
942	0	0	0	0	0	0	0	0	0	0	0	0	0	0	0	0	0.9857156	0
942.5	0	0	0	0	0	0	0	0	0	0	0	0	0	0	0	0	0.9728718	0
943	0	0	0	0	0	0	0	0	0	0	0	0	0	0	0	0	0.9687848	0
943.5	0	0	0	0	0	0	0	0	0	0	0	0	0	0	0	0	0.9634386	0
944	0	0	0	0	0	0	0	0	0	0	0	0	0	0	0	0	0.9424678	0
944.5	0	0	0	0	0	0	0	0	0	0	0	0	0	0	0	0	0.8954948	0
945	0	0	0	0	0	0	0	0	0	0	0	0	0	0	0	0	0.8255946	0
945.5	0	0	0	0	0	0	0	0	0	0	0	0	0	0	0	0	0.7573774	0
946	0	0	0	0	0	0	0	0	0	0	0	0	0	0	0	0	0.7034982	0
946.5	0	0	0	0	0	0	0	0	0	0	0	0	0	0	0	0	0.648624	0
947	0	0	0	0	0	0	0	0	0	0	0	0	0	0	0	0	0.5807966	0
947.5	0	0	0	0	0	0	0	0	0	0	0	0	0	0	0	0	0.5045456	0
948	0	0	0	0	0	0	0	0	0	0	0	0	0	0	0	0	0.4294014	0
948.5	0	0	0	0	0	0	0	0	0	0	0	0	0	0	0	0	0.3652576	0
949	0	0	0	0	0	0	0	0	0	0	0	0	0	0	0	0	0.3123624	0
949.5	0	0	0	0	0	0	0	0	0	0	0	0	0	0	0	0	0.2600168	0
950	0	0	0	0	0	0	0	0	0	0	0	0	0	0	0	0	0.2070454	0
950.5	0	0	0	0	0	0	0	0	0	0	0	0	0	0	0	0	0.1640296	0
951	0	0	0	0	0	0	0	0	0	0	0	0	0	0	0	0	0.1346654	0
951.5	0	0	0	0	0	0	0	0	0	0	0	0	0	0	0	0	0.1151476	0
952	0	0	0	0	0	0	0	0	0	0	0	0	0	0	0	0	0.101545	0
952.5	0	0	0	0	0	0	0	0	0	0	0	0	0	0	0	0	0.09086	0
953	0	0	0	0	0	0	0	0	0	0	0	0	0	0	0	0	0.0820082	0
953.5	0	0	0	0	0	0	0	0	0	0	0	0	0	0	0	0	0.0760108	0
954	0	0	0	0	0	0	0	0	0	0	0	0	0	0	0	0	0.0729682	0
954.5	0	0	0	0	0	0	0	0	0	0	0	0	0	0	0	0	0.0706728	0
955	0	0	0	0	0	0	0	0	0	0	0	0	0	0	0	0	0.0666164	0
955.5	0	0	0	0	0	0	0	0	0	0	0	0	0	0	0	0	0.058863	0
956	0	0	0	0	0	0	0	0	0	0	0	0	0	0	0	0	0.0479172	0
956.5	0	0	0	0	0	0	0	0	0	0	0	0	0	0	0	0	0.0366986	0
957	0	0	0	0	0	0	0	0	0	0	0	0	0	0	0	0	0.0267126	0
957.5	0	0	0	0	0	0	0	0	0	0	0	0	0	0	0	0	0.0179146	0
958	0	0	0	0	0	0	0	0	0	0	0	0	0	0	0	0	0.0109392	0
958.5	0	0	0	0	0	0	0	0	0	0	0	0	0	0	0	0	0.0063848	0
959	0	0	0	0	0	0	0	0	0	0	0	0	0	0	0	0	0.0038246	0
959.5	0	0	0	0	0	0	0	0	0	0	0	0	0	0	0	0	0.0025302	0
960	0	0	0	0	0	0	0	0	0	0	0	0	0	0	0	0	0.0018872	0
960.5	0	0	0	0	0	0	0	0	0	0	0	0	0	0	0	0	0.0014712	0
961	0	0	0	0	0	0	0	0	0	0	0	0	0	0	0	0	0.0011204	0
961.5	0	0	0	0	0	0	0	0	0	0	0	0	0	0	0	0	0.0008248	0
962	0	0	0	0	0	0	0	0	0	0	0	0	0	0	0	0	0.0006224	0
962.5	0	0	0	0	0	0	0	0	0	0	0	0	0	0	0	0	0.0005724	0
963	0	0	0	0	0	0	0	0	0	0	0	0	0	0	0	0	0.0006274	0
963.5	0	0	0	0	0	0	0	0	0	0	0	0	0	0	0	0	0.0005276	0
964	0	0	0	0	0	0	0	0	0	0	0	0	0	0	0	0	0.000307	0
964.5	0	0	0	0	0	0	0	0	0	0	0	0	0	0	0	0	5.18E-05	0
965	0	0	0	0	0	0	0	0	0	0	0	0	0	0	0	0	0	0
965.5	0	0	0	0	0	0	0	0	0	0	0	0	0	0	0	0	0	0
966	0	0	0	0	0	0	0	0	0	0	0	0	0	0	0	0	0	0
966.5	0	0	0	0	0	0	0	0	0	0	0	0	0	0	0	0	0	0
967	0	0	0	0	0	0	0	0	0	0	0	0	0	0	0	0	0	0
967.5	0	0	0	0	0	0	0	0	0	0	0	0	0	0	0	0	0	0
968	0	0	0	0	0	0	0	0	0	0	0	0	0	0	0	0	0	0
968.5	0	0	0	0	0	0	0	0	0	0	0	0	0	0	0	0	0	0
969	0	0	0	0	0	0	0	0	0	0	0	0	0	0	0	0	0	0
969.5	0	0	0	0	0	0	0	0	0	0	0	0	0	0	0	0	0	0
970	0	0	0	0	0	0	0	0	0	0	0	0	0	0	0	0	0	0
970.5	0	0	0	0	0	0	0	0	0	0	0	0	0	0	0	0	0	0
971	0	0	0	0	0	0	0	0	0	0	0	0	0	0	0	0	0	0
971.5	0	0	0	0	0	0	0	0	0	0	0	0	0	0	0	0	0	0
972	0	0	0	0	0	0	0	0	0	0	0	0	0	0	0	0	0	0
972.5	0	0	0	0	0	0	0	0	0	0	0	0	0	0	0	0	0	0
973	0	0	0	0	0	0	0	0	0	0	0	0	0	0	0	0	0	0
973.5	0	0	0	0	0	0	0	0	0	0	0	0	0	0	0	0	0	0
974	0	0	0	0	0	0	0	0	0	0	0	0	0	0	0	0	0	0
974.5	0	0	0	0	0	0	0	0	0	0	0	0	0	0	0	0	0	0
975	0	0	0	0	0	0	0	0	0	0	0	0	0	0	0	0	0	0
975.5	0	0	0	0	0	0	0	0	0	0	0	0	0	0	0	0	0	0
976	0	0	0	0	0	0	0	0	0	0	0	0	0	0	0	0	0	0
976.5	0	0	0	0	0	0	0	0	0	0	0	0	0	0	0	0	0	0
977	0	0	0	0	0	0	0	0	0	0	0	0	0	0	0	0	0	0
977.5	0	0	0	0	0	0	0	0	0	0	0	0	0	0	0	0	0	0
978	0	0	0	0	0	0	0	0	0	0	0	0	0	0	0	0	0	0
978.5	0	0	0	0	0	0	0	0	0	0	0	0	0	0	0	0	0	0
979	0	0	0	0	0	0	0	0	0	0	0	0	0	0	0	0	0	0
979.5	0	0	0	0	0	0	0	0	0	0	0	0	0	0	0	0	0	0
980	0	0	0	0	0	0	0	0	0	0	0	0	0	0	0	0	0	0
980.5	0	0	0	0	0	0	0	0	0	0	0	0	0	0	0	0	0	0
981	0	0	0	0	0	0	0	0	0	0	0	0	0	0	0	0	0	0
981.5	0	0	0	0	0	0	0	0	0	0	0	0	0	0	0	0	0	0
982	0	0	0	0	0	0	0	0	0	0	0	0	0	0	0	0	0	0
982.5	0	0	0	0	0	0	0	0	0	0	0	0	0	0	0	0	0	0
983	0	0	0	0	0	0	0	0	0	0	0	0	0	0	0	0	0	0
983.5	0	0	0	0	0	0	0	0	0	0	0	0	0	0	0	0	0	0
984	0	0	0	0	0	0	0	0	0	0	0	0	0	0	0	0	0	0
984.5	0	0	0	0	0	0	0	0	0	0	0	0	0	0	0	0	0	0
985	0	0	0	0	0	0	0	0	0	0	0	0	0	0	0	0	0	0
985.5	0	0	0	0	0	0	0	0	0	0	0	0	0	0	0	0	0	0
986	0	0	0	0	0	0	0	0	0	0	0	0	0	0	0	0	0	0
986.5	0	0	0	0	0	0	0	0	0	0	0	0	0	0	0	0	0	0
987	0	0	0	0	0	0	0	0	0	0	0	0	0	0	0	0	0	0
987.5	0	0	0	0	0	0	0	0	0	0	0	0	0	0	0	0	0	0
988	0	0	0	0	0	0	0	0	0	0	0	0	0	0	0	0	0	0
988.5	0	0	0	0	0	0	0	0	0	0	0	0	0	0	0	0	0	0
989	0	0	0	0	0	0	0	0	0	0	0	0	0	0	0	0	0	0
989.5	0	0	0	0	0	0	0	0	0	0	0	0	0	0	0	0	0	0
990	0	0	0	0	0	0	0	0	0	0	0	0	0	0	0	0	0	0
990.5	0	0	0	0	0	0	0	0	0	0	0	0	0	0	0	0	0	0
991	0	0	0	0	0	0	0	0	0	0	0	0	0	0	0	0	0	0
991.5	0	0	0	0	0	0	0	0	0	0	0	0	0	0	0	0	0	0
992	0	0	0	0	0	0	0	0	0	0	0	0	0	0	0	0	0	0
992.5	0	0	0	0	0	0	0	0	0	0	0	0	0	0	0	0	0	0
993	0	0	0	0	0	0	0	0	0	0	0	0	0	0	0	0	0	0.0003024
993.5	0	0	0	0	0	0	0	0	0	0	0	0	0	0	0	0	0	0.0004436
994	0	0	0	0	0	0	0	0	0	0	0	0	0	0	0	0	0	0.0005712
994.5	0	0	0	0	0	0	0	0	0	0	0	0	0	0	0	0	0	0.0006046
995	0	0	0	0	0	0	0	0	0	0	0	0	0	0	0	0	0	0.0005868
995.5	0	0	0	0	0	0	0	0	0	0	0	0	0	0	0	0	0	0.000746
996	0	0	0	0	0	0	0	0	0	0	0	0	0	0	0	0	0	0.0011054
996.5	0	0	0	0	0	0	0	0	0	0	0	0	0	0	0	0	0	0.0012506
997	0	0	0	0	0	0	0	0	0	0	0	0	0	0	0	0	0	0.0011686
997.5	0	0	0	0	0	0	0	0	0	0	0	0	0	0	0	0	0	0.0012648
998	0	0	0	0	0	0	0	0	0	0	0	0	0	0	0	0	0	0.0016302
998.5	0	0	0	0	0	0	0	0	0	0	0	0	0	0	0	0	0	0.0020316
999	0	0	0	0	0	0	0	0	0	0	0	0	0	0	0	0	0	0.002359
999.5	0	0	0	0	0	0	0	0	0	0	0	0	0	0	0	0	0	0.0027226
1000	0	0	0	0	0	0	0	0	0	0	0	0	0	0	0	0	0	0.0031684
1000.5	0	0	0	0	0	0	0	0	0	0	0	0	0	0	0	0	0	0.003641
1001	0	0	0	0	0	0	0	0	0	0	0	0	0	0	0	0	0	0.004124
1001.5	0	0	0	0	0	0	0	0	0	0	0	0	0	0	0	0	0	0.0046426
1002	0	0	0	0	0	0	0	0	0	0	0	0	0	0	0	0	0	0.0051248
1002.5	0	0	0	0	0	0	0	0	0	0	0	0	0	0	0	0	0	0.0054382
1003	0	0	0	0	0	0	0	0	0	0	0	0	0	0	0	0	0	0.0057322
1003.5	0	0	0	0	0	0	0	0	0	0	0	0	0	0	0	0	0	0.0063256
1004	0	0	0	0	0	0	0	0	0	0	0	0	0	0	0	0	0	0.0071606
1004.5	0	0	0	0	0	0	0	0	0	0	0	0	0	0	0	0	0	0.0078944
1005	0	0	0	0	0	0	0	0	0	0	0	0	0	0	0	0	0	0.0085436
1005.5	0	0	0	0	0	0	0	0	0	0	0	0	0	0	0	0	0	0.009379
1006	0	0	0	0	0	0	0	0	0	0	0	0	0	0	0	0	0	0.0103704
1006.5	0	0	0	0	0	0	0	0	0	0	0	0	0	0	0	0	0	0.0112628
1007	0	0	0	0	0	0	0	0	0	0	0	0	0	0	0	0	0	0.0120742
1007.5	0	0	0	0	0	0	0	0	0	0	0	0	0	0	0	0	0	0.012998
1008	0	0	0	0	0	0	0	0	0	0	0	0	0	0	0	0	0	0.0144066
1008.5	0	0	0	0	0	0	0	0	0	0	0	0	0	0	0	0	0	0.0173406
1009	0	0	0	0	0	0	0	0	0	0	0	0	0	0	0	0	0	0.0252284
1009.5	0	0	0	0	0	0	0	0	0	0	0	0	0	0	0	0	0	0.0477072
1010	0	0	0	0	0	0	0	0	0	0	0	0	0	0	0	0	0	0.0935998
1010.5	0	0	0	0	0	0	0	0	0	0	0	0	0	0	0	0	0	0.1464162
1011	0	0	0	0	0	0	0	0	0	0	0	0	0	0	0	0	0	0.198051
1011.5	0	0	0	0	0	0	0	0	0	0	0	0	0	0	0	0	0	0.2713502
1012	0	0	0	0	0	0	0	0	0	0	0	0	0	0	0	0	0	0.3692796
1012.5	0	0	0	0	0	0	0	0	0	0	0	0	0	0	0	0	0	0.4650002
1013	0	0	0	0	0	0	0	0	0	0	0	0	0	0	0	0	0	0.5588862
1013.5	0	0	0	0	0	0	0	0	0	0	0	0	0	0	0	0	0	0.6760942
1014	0	0	0	0	0	0	0	0	0	0	0	0	0	0	0	0	0	0.801227
1014.5	0	0	0	0	0	0	0	0	0	0	0	0	0	0	0	0	0	0.889254
1015	0	0	0	0	0	0	0	0	0	0	0	0	0	0	0	0	0	0.9362508
1015.5	0	0	0	0	0	0	0	0	0	0	0	0	0	0	0	0	0	0.9632482
1016	0	0	0	0	0	0	0	0	0	0	0	0	0	0	0	0	0	0.977963
1016.5	0	0	0	0	0	0	0	0	0	0	0	0	0	0	0	0	0	0.9826062
1017	0	0	0	0	0	0	0	0	0	0	0	0	0	0	0	0	0	0.9859758
1017.5	0	0	0	0	0	0	0	0	0	0	0	0	0	0	0	0	0	0.9951046
1018	0	0	0	0	0	0	0	0	0	0	0	0	0	0	0	0	0	0.9974028
1018.5	0	0	0	0	0	0	0	0	0	0	0	0	0	0	0	0	0	0.9806878
1019	0	0	0	0	0	0	0	0	0	0	0	0	0	0	0	0	0	0.9613162
1019.5	0	0	0	0	0	0	0	0	0	0	0	0	0	0	0	0	0	0.9554714
1020	0	0	0	0	0	0	0	0	0	0	0	0	0	0	0	0	0	0.9423782
1020.5	0	0	0	0	0	0	0	0	0	0	0	0	0	0	0	0	0	0.8994426
1021	0	0	0	0	0	0	0	0	0	0	0	0	0	0	0	0	0	0.8421622
1021.5	0	0	0	0	0	0	0	0	0	0	0	0	0	0	0	0	0	0.786125
1022	0	0	0	0	0	0	0	0	0	0	0	0	0	0	0	0	0	0.7109708
1022.5	0	0	0	0	0	0	0	0	0	0	0	0	0	0	0	0	0	0.6045002
1023	0	0	0	0	0	0	0	0	0	0	0	0	0	0	0	0	0	0.4944154
1023.5	0	0	0	0	0	0	0	0	0	0	0	0	0	0	0	0	0	0.3955374
1024	0	0	0	0	0	0	0	0	0	0	0	0	0	0	0	0	0	0.2861938
1024.5	0	0	0	0	0	0	0	0	0	0	0	0	0	0	0	0	0	0.1711342
1025	0	0	0	0	0	0	0	0	0	0	0	0	0	0	0	0	0	0.0833096
1025.5	0	0	0	0	0	0	0	0	0	0	0	0	0	0	0	0	0	0.0341594
1026	0	0	0	0	0	0	0	0	0	0	0	0	0	0	0	0	0	0.012879
1026.5	0	0	0	0	0	0	0	0	0	0	0	0	0	0	0	0	0	0.0047952
1027	0	0	0	0	0	0	0	0	0	0	0	0	0	0	0	0	0	0.001597
1027.5	0	0	0	0	0	0	0	0	0	0	0	0	0	0	0	0	0	0.0004414
