# Supplementary figures and images for: Measurements of spectral irradiance during the solar eclipse of 21 August 2017: reassessment of the effect of solar limb darkening and of changes in total ozone
Source: Copernicus journal article supplement (doi:10.5194/acp-19-4703-2019), 2019-04-09

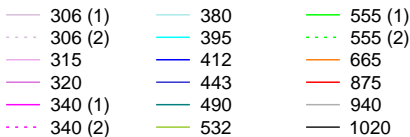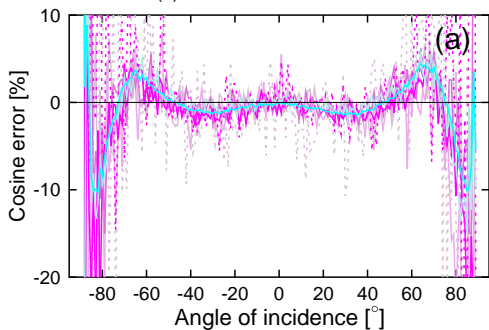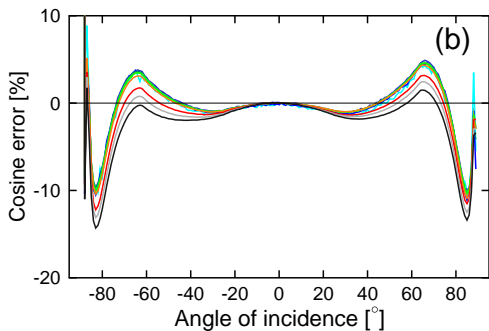

Supplement: Supplementary file 1 [file acp-19-4703-2019-supplement.zip]

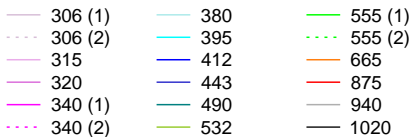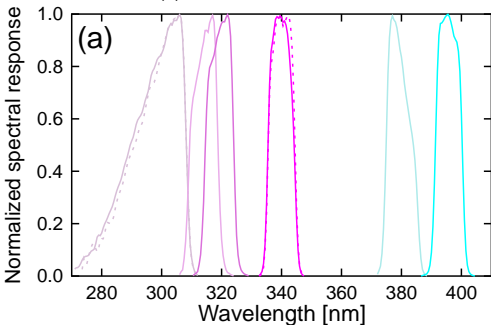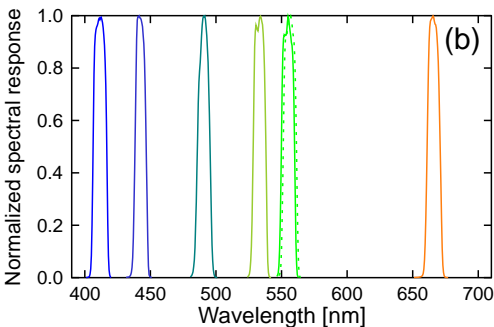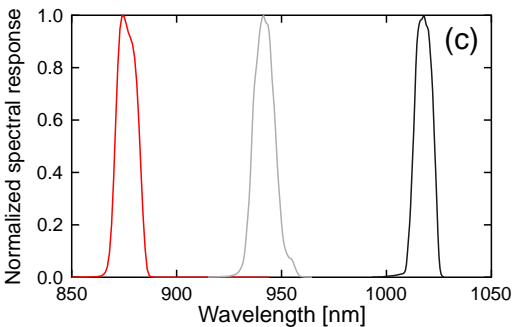

Supplement: Supplementary file 2 [file acp-19-4703-2019-supplement.zip]
